# Supplementary material for: Visible-light excited copper activating unactivated alkyl iodides for radical addition/cyclization to access oxindole derivatives
Source: Royal Society of Chemistry journal article supplement (doi:10.1039/d4qo01329h), 2024-01-01
Supplement: d4qo01329h1.pdf [file d4qo01329h1.pdf]

## *Supplementary information*

### Visible-Light Excited Copper Activating Unactivated Alkyl Iodides for Radical Cascade Addition/Cyclization to Access Oxindole Derivatives

Hang Luo<sup>†</sup>, Fangnian Yu<sup>†</sup>, Luqing Lin\*

School of Chemistry, Dalian University of Technology, Dalian, Liaoning 116024, China

*Copper photocatalysis, Alkyl radical, Unactivated iodides, Radical cyclization.*

## Content

|                                                                      |            |
|----------------------------------------------------------------------|------------|
| <b>1. General Information .....</b>                                  | <b>S3</b>  |
| <b>2. Experimental details for radical cascade cyclization .....</b> | <b>S4</b>  |
| <b>3. Characterization data of cyclization products .....</b>        | <b>S8</b>  |
| <b>3. Mechanistic study .....</b>                                    | <b>S18</b> |
| <b>4. NMR Spectra .....</b>                                          | <b>S20</b> |
| <b>5. Reference .....</b>                                            | <b>S45</b> |

## 1. General Information

### 1.1 Materials and methods

Unless otherwise noted, all the materials were commercially available and used without further purification. All solvents were dried before use according to the standard methods. All reactions were performed in an N<sub>2</sub>-filled glovebox using standard Schlenk techniques unless otherwise noted. All reactions were monitored by thin-layer chromatography (TLC), visualized by UV and KMnO<sub>4</sub> staining. Chromatographic purification of products was accomplished by silica gel chromatography. <sup>1</sup>H NMR, <sup>13</sup>C NMR and <sup>19</sup>F NMR spectra were recorded on a Bruker Avance II 400. NMR data is reported relative to internal CHCl<sub>3</sub> (<sup>1</sup>H,  $\delta$  = 7.26), CDCl<sub>3</sub> (<sup>13</sup>C,  $\delta$  = 77.0). Data for <sup>1</sup>H NMR spectra are reported as follows: chemical shift ( $\delta$ ) in ppm; multiplicities are indicated s (singlet), brs (broad singlet), d (doublet), t (triplet), m (multiplet); coupling constants (J) are in Hertz (Hz) <sup>13</sup>C NMR spectra were reported as chemical shifts in ppm. The HRMS were obtained by using a Q Exactive high resolution liquid chromatography mass spectrometer (Q Exactive Plus) in ESI<sup>+</sup> mode or ESI<sup>-</sup> mode. The eight-position parallel light reaction system (RLH-18) and the large volume light reaction system (RLH-054) with 410 nm blue LEDs were purchased from Beijing Roger Technologies.

## 2. Experimental details for radical cascade cyclization

### 2.1 Reaction optimization

**Procedure for optimization :** To an oven-dried 10 mL reaction vial were added Cu salt (5 mol%), L1 (5 mol%), and 1 mL solvent in a nitrogen-filled glove box. The resulting mixture was stirred for 5 min, followed by adding base, *N*-Arylacrylamides (1.0 equiv) and *tert*-butyl 4-iodopiperidine-1-carboxylate (1.5 equiv) in sequence, and sealed with a screwed cap. The sealed vial was placed on a photo-reactor under irradiation of 6W LEDs. The mixture was stirred at 25 °C for 15 h, quenched with H<sub>2</sub>O, and extracted with ethyl acetate. The combined organic layers were dried over anhydrous Na<sub>2</sub>SO<sub>4</sub>, concentrated in vacuo. The crude product was analyzed by <sup>1</sup>H NMR with 1,3,5-Trimethoxybenzene as the internal standard.

**Table S1 base effect**

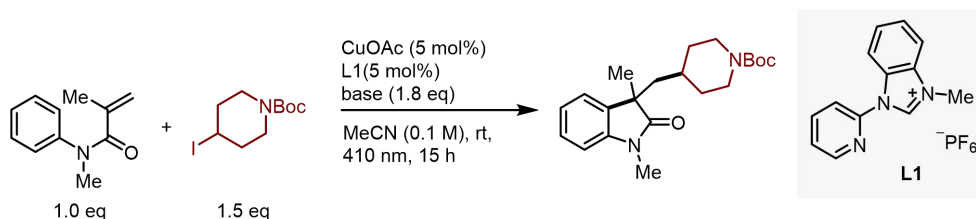

CuOAc (5 mol%)  
L1 (5 mol%)  
base (1.8 eq)  
MeCN (0.1 M), rt,  
410 nm, 15 h

1.0 eq      1.5 eq

Yield (%)

| entry | base                            | Yield(%) |
|-------|---------------------------------|----------|
| 1     | MTBD                            | 38       |
| 2     | Et <sub>3</sub> N               | 15       |
| 3     | DIPEA                           | 18       |
| 4     | DBU                             | trace    |
| 5     | TMG                             | 47       |
| 6     | Cs <sub>2</sub> CO <sub>3</sub> | trace    |
| 7     | K <sub>3</sub> PO <sub>4</sub>  | 18       |
| 8     | BTMG                            | 15       |
| 9     | DBACO                           | 15       |

**Table S2 solvent effect**

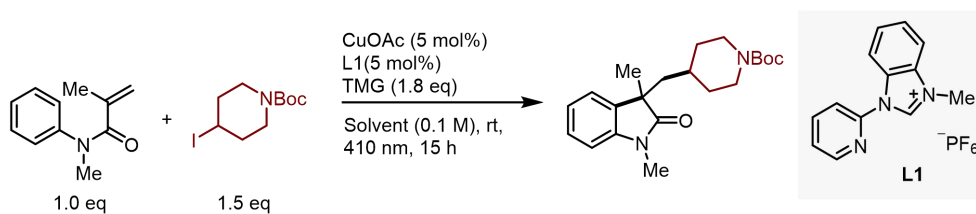

CuOAc (5 mol%)  
L1 (5 mol%)  
TMG (1.8 eq)  
Solvent (0.1 M), rt,  
410 nm, 15 h

1.0 eq      1.5 eq

Yield (%)

| entry | solvent | Yield(%) |
|-------|---------|----------|
| 1     | THF     | 72       |
| 2     | DMF     | 54       |
| 3     | DME     | 42       |
| 4     | DMSO    | 27       |



**Table S3 copper salt effect**

| entry | Cu salt              | Yield(%) |
|-------|----------------------|----------|
| 1     | CuBr                 | 75       |
| 2     | CuI                  | 63       |
| 3     | Cu(OAc) <sub>2</sub> | 69       |
| 4     | Cu(OTf) <sub>2</sub> | 90 (88)  |

Isolated yield in parentheses.

**Table S4 ligand effect**

| entry | Ligand              | Yield(%) |
|-------|---------------------|----------|
| 1     | BINAP               | 16       |
| 2     | 1,10-Phenanthroline | trace    |
| 3     | dtbbpy              | trace    |
| 4     | terpyridine         | trace    |
| 5     | IMes NHC            | 5        |

**Table S5 Control experiments**

| entry | variants from standard conditions | Yield(%) |
|-------|-----------------------------------|----------|
| 1     | w/o light                         | n.d.     |
| 2     | w/o Cu(OTf) <sub>2</sub>          | 8%       |
| 3     | w/o L1                            | trace    |
| 4     | open in air                       | n.d.     |

## 2.2 General procedure of C(sp<sup>3</sup>)-C formation (general procedure)

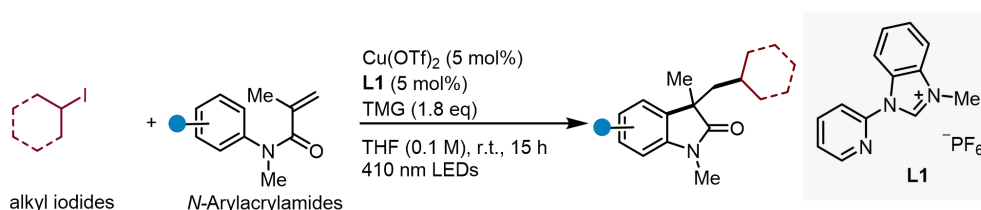

To an oven-dried 10 mL reaction vial were added  $\text{Cu}(\text{OTf})_2$  (1.81 mg, 0.005 mmol, 5 mol%), **L1** (1.77 mg, 0.005 mmol, 5 mol%), and 1 mL THF in a nitrogen-filled glove box. The resulting mixture was stirred for 5 min, followed by adding 1,1,3,3-Tetramethylguanidine (TMG) (23  $\mu\text{L}$ , 0.18 mmol, 1.8 equiv), *N*-Arylacrylamides (0.1 mmol, 1.0 equiv) and alkyl iodides (0.15 mmol, 1.5 equiv) in sequence, and sealed with a screwed cap. The sealed vial was placed on a photo-reactor under irradiation of LEDs (410 nm, 6 W). The mixture was stirred at 25  $^{\circ}\text{C}$  for 15 h, quenched with  $\text{H}_2\text{O}$ , and extracted with ethyl acetate. The combined organic layers were dried over anhydrous  $\text{Na}_2\text{SO}_4$ , concentrated in vacuo. The crude product was purified by silica gel column chromatography to afford the coupling product.

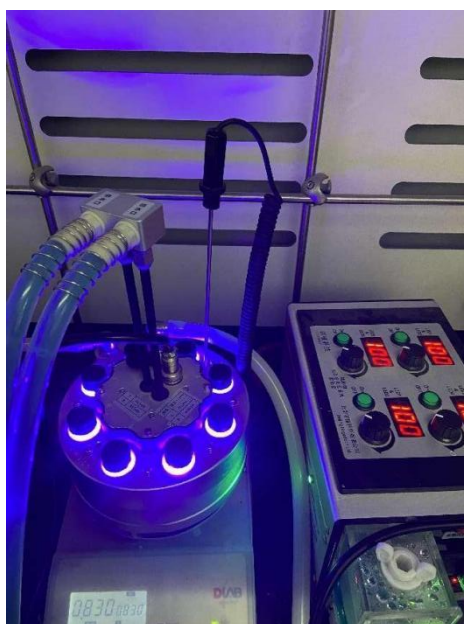

**Figure S1.** The eight-position parallel light reaction system (RLH-18)

### 2.3 scale up reaction

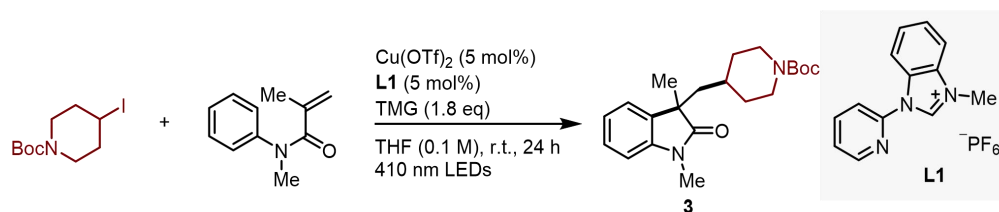

#### 6 mmol scale for synthesis of **3**:

To an oven-dried 250 mL round-bottomed flask were added  $\text{Cu}(\text{OTf})_2$  (108.6 mg, 0.30 mmol, 5 mol%), **L1** (106.2 mg, 0.30 mmol, 5 mol%), and 60 mL THF in a nitrogen-filled glove box. The resulting mixture was stirred for 10 min, followed by adding 1,1,3,3-Tetramethylguanidine (TMG) (1.38 mL, 10.8 mmol, 1.8 equiv), *N*-Arylacrylamides (1.05 g, 6.0 mmol, 1.0 equiv) and *tert*-butyl 4-iodopiperidine-1-carboxylate (2.80 g, 9.0 mmol, 1.5 equiv) in sequence, and sealed with a screwed cap. The sealed flask was placed on a large volume photo-reactor under irradiation of LEDs (410 nm, 50 W  $\times$  2). The mixture was stirred at 25 °C for 24 h, quenched with  $\text{H}_2\text{O}$ , and extracted with ethyl acetate. The combined organic layers were dried over anhydrous  $\text{Na}_2\text{SO}_4$ , concentrated in vacuo. The crude product was purified by silica gel column chromatography to afford the coupling product **3** (1.72 g, 80% yield).

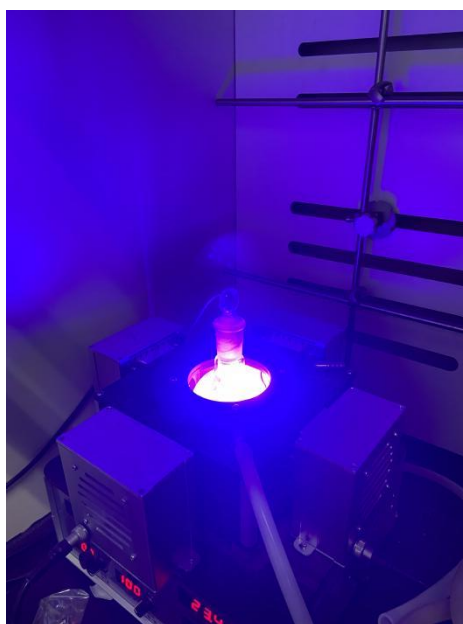

**Figure S2.** The large volume light reaction system (RLH-054)

### 3. Characterization data of cyclization products

#### *tert*-butyl 4-((1,3-dimethyl-2-oxoindolin-3-yl)methyl)piperidine-1-carboxylate (**3**)

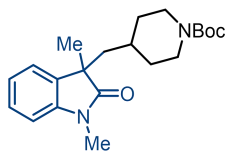

Prepared according to the **general procedure** from *N*-methyl-*N*-phenylmethacrylamide (17.5 mg, 0.1 mmol) and *tert*-butyl 4-iodopiperidine-1-carboxylate (46.7 mg, 0.15 mmol). The crude residue was purified by column chromatography to yield **3** (28.9 mg, 88% yield) as a colorless oil.

**<sup>1</sup>H NMR (400 MHz, CDCl<sub>3</sub>):** δ 7.29 – 7.24 (m, 1H), 7.15 (d, *J* = 7.2 Hz, 1H), 7.09 – 7.03 (m, 1H), 6.85 (d, *J* = 7.7 Hz, 1H), 3.84 (brs, 2H), 3.22 (s, 3H), 2.41 (q, *J* = 13.3, 12.7 Hz, 2H), 1.97 (dd, *J* = 14.1, 6.1 Hz, 1H), 1.76 (dd, *J* = 14.1, 5.2 Hz, 1H), 1.39 (s, 9H), 1.33 – 1.24 (m, 4H), 1.12 – 0.99 (m, 3H), 0.96 – 0.84 (m, 1H). **<sup>13</sup>C NMR (101 MHz, CDCl<sub>3</sub>):** δ 180.7, 154.6, 142.9, 134.0, 127.8, 122.6, 122.5, 108.1, 79.1, 47.7, 44.4, 33.1, 33.0, 32.4, 28.4, 26.2, 26.1.

All other spectroscopic analyses were in agreement with the literature<sup>1</sup>.

#### *N*-(4-cyanophenyl)-*N*-methylmethacrylamide (**4**)

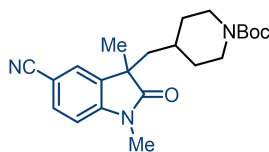

Prepared according to the **general procedure** from *N*-(4-cyanophenyl)-*N*-methylmethacrylamide (20.2 mg, 0.1 mmol) and *tert*-butyl 4-iodopiperidine-1-carboxylate (46.7 mg, 0.15 mmol). The crude residue was purified by column chromatography to yield **4** (35.1 mg, 92% yield) as a colorless oil.

**<sup>1</sup>H NMR (400 MHz, CDCl<sub>3</sub>):** δ 7.61 (d, *J* = 8.1 Hz, 1H), 7.40 (s, 1H), 6.92 (d, *J* = 8.1 Hz, 1H), 3.86 (brs, 2H), 3.24 (s, 3H), 2.49 – 2.34 (m, 2H), 2.05 – 1.96 (m, 1H), 1.81 – 1.73 (m, 1H), 1.39 (s, 9H), 1.33 (s, 3H), 1.26 – 1.19 (m, 1H), 1.11 – 0.89 (m, 4H). **<sup>13</sup>C NMR (101 MHz, CDCl<sub>3</sub>):** δ 180.3, 154.5, 146.8, 135.0, 133.3, 126.0, 119.2, 108.6, 105.7, 79.3, 47.5, 44.1, 33.1, 33.0, 32.2, 28.3, 26.5, 26.0. **HRMS (ESI):** Calcd for C<sub>22</sub>H<sub>29</sub>N<sub>3</sub>O<sub>3</sub>Na [M+Na]<sup>+</sup>:406.2101, found 406.2099

#### *tert*-butyl

#### 4-((5-chloro-1,3-dimethyl-2-oxoindolin-3-yl)methyl)piperidine-1-carboxylate (**5**)

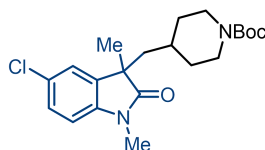

Prepared according to the **general procedure** from *N*-(4-chlorophenyl)-*N*-methylmethacrylamide (21.0 mg, 0.1 mmol) and *tert*-butyl 4-iodopiperidine-1-carboxylate

te (46.7 mg, 0.15 mmol), The crude residue was purified by column chromatography to yield **5** (34.6 mg, 88% yield) as a colorless oil.

**<sup>1</sup>H NMR (400 MHz, CDCl<sub>3</sub>):** δ 7.24 (dd, *J* = 8.4, 2.1 Hz, 1H), 7.12 (d, *J* = 1.9 Hz, 1H), 6.77 (d, *J* = 8.3 Hz, 1H), 3.86 (brs, 2H), 3.20 (s, 3H), 2.43 (t, *J* = 11.5 Hz, 2H), 1.97 (dd, *J* = 14.2, 6.4 Hz, 1H), 1.73 (dd, *J* = 14.2, 5.1 Hz, 1H), 1.39 (s, 9H), 1.31 (s, 3H), 1.28 – 1.22 (m, 1H), 1.15 – 0.90 (m, 4H). **<sup>13</sup>C NMR (101 MHz, CDCl<sub>3</sub>):** δ 180.1, 154.6, 141.5, 135.7, 128.0, 127.8, 123.2, 109.0, 79.2, 47.9, 44.3, 33.1, 33.0, 32.3, 28.4, 26.3, 26.2.

All other spectroscopic analyses were in agreement with the literature<sup>2</sup>.

## methyl

### 3-((1-(tert-butoxycarbonyl)piperidin-4-yl)methyl)-1,3-dimethyl-2-oxoindoline-5-carboxylate (**6**)

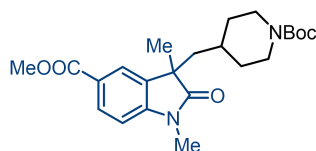

Prepared according to the **general procedure** from methyl 4-(*N*-methylmethacrylamido)benzoate (23.3 mg, 0.1 mmol) and *tert*-butyl 4-iodopiperidine-1-carboxylate (46.7 mg, 0.15 mmol), The crude residue was purified by column chromatography to yield **71** (27.0 mg, 65% yield) as a colorless oil.

**<sup>1</sup>H NMR (400 MHz, CDCl<sub>3</sub>):** δ 8.03 (d, *J* = 8.2 Hz, 1H), 7.83 (s, 1H), 6.89 (d, *J* = 8.2 Hz, 1H), 3.91 (s, 3H), 3.84 (brs, 2H), 3.25 (s, 3H), 2.46 – 2.34 (m, 2H), 2.00 (dd, *J* = 14.2, 6.2 Hz, 1H), 1.81 (dd, *J* = 14.1, 4.9 Hz, 1H), 1.39 (s, 9H), 1.34 (s, 3H), 1.29 – 1.20 (m, 1H), 1.12 – 0.98 (m, 3H), 1.12 – 0.98 (m, 1H). **<sup>13</sup>C NMR (101 MHz, CDCl<sub>3</sub>):** δ 181.0, 166.9, 154.6, 147.1, 133.9, 130.6, 124.5, 123.9, 107.7, 79.2, 52.1, 47.5, 44.2, 33.1, 33.0, 32.3, 28.4, 26.4, 26.1. **HRMS (ESI):** Calcd for C<sub>23</sub>H<sub>32</sub>N<sub>2</sub>O<sub>5</sub>Na [M+Na]<sup>+</sup>:439.2203, found 439.2198

### *tert*-butyl 4-((1,3,5-trimethyl-2-oxoindolin-3-yl)methyl)piperidine-1-carboxylate (**7**)

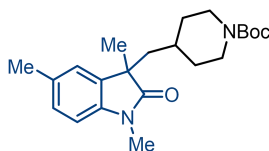

Prepared according to the **general procedure** from *N*-methyl-*N*-(*p*-tolyl)methacrylamide (18.9 mg, 0.1 mmol) and *tert*-butyl 4-iodopiperidine-1-carboxylate (46.7 mg, 0.15 mmol), The crude residue was purified by column chromatography to yield **7** (32.4 mg, 87% yield) as a colorless oil.

**<sup>1</sup>H NMR (400 MHz, CDCl<sub>3</sub>):** δ 7.05 (d, *J* = 7.8 Hz, 1H), 6.95 (s, 1H), 6.73 (d, *J* = 7.9 Hz, 1H), 3.83 (brs, 2H), 3.19 (s, 3H), 2.50 – 2.29 (m, 5H), 1.95 (dd, *J* = 14.1, 6.3 Hz, 1H), 1.72 (dd, *J* = 14.1, 5.3 Hz, 1H), 1.39 (s, 9H), 1.31 – 1.28 (m, 4H), 1.15 – 0.85 (m, 4H). **<sup>13</sup>C NMR (101 MHz, CDCl<sub>3</sub>):** δ 180.6, 154.6, 140.5, 134.0, 132.0, 128.0, 123.4,

107.8, 79.1, 47.7, 44.4, 33.1, 33.0, 32.4, 28.4, 26.2, 26.2, 21.2. **HRMS (ESI):** Calcd for  $C_{22}H_{32}N_2O_3Na$   $[M+Na]^+$ :395.2305, found 395.2303

**tert-butyl**

**4-((5-methoxy-1,3-dimethyl-2-oxoindolin-3-yl)methyl)piperidine-1-carboxylate (8)**

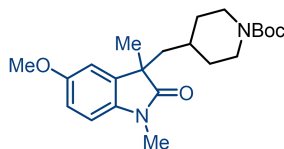

Prepared according to the **general procedure** from *N*-(4-methoxyphenyl)-*N*-methylmethacrylamide (20.5 mg, 0.1 mmol) and *tert*-butyl 4-iodopiperidine-1-carboxylate (46.7 mg, 0.15 mmol). The crude residue was purified by column chromatography to yield **70** (23.1 mg, 59% yield) as a colorless oil.

**$^1H$  NMR (400 MHz,  $CDCl_3$ ):**  $\delta$  6.81 – 6.73 (m, 3H), 3.92 – 3.78 (m, 5H), 3.20 (s, 3H), 2.49 – 2.36 (m, 1H), 1.97 (dd,  $J$  = 14.1, 6.4 Hz, 1H), 1.72 (dd,  $J$  = 14.1, 5.4 Hz, 1H), 1.39 (s, 9H), 1.31 (s, 3H), 1.27 – 1.21 (m, 1H), 1.15 – 0.99 (m, 3H), 0.95 – 0.84 (m, 1H).  **$^{13}C$  NMR (101 MHz,  $CDCl_3$ ):**  $\delta$  180.4, 156.0, 154.6, 136.5, 135.5, 111.5, 110.5, 108.3, 79.1, 55.8, 48.1, 44.4, 33.1, 33.0, 32.4, 28.4, 26.3, 26.3.

All other spectroscopic analyses were in agreement with the literature<sup>3</sup>.

**tert-butyl**

**4-((7-fluoro-1,3-dimethyl-2-oxoindolin-3-yl)methyl)piperidine-1-carboxylate (9)**

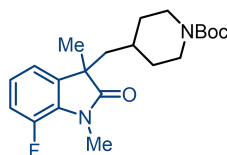

Prepared according to the **general procedure** from *N*-(2-fluorophenyl)-*N*-methylmethacrylamide (19.3 mg, 0.1 mmol) and *tert*-butyl 4-iodopiperidine-1-carboxylate (46.7 mg, 0.15 mmol). The crude residue was purified by column chromatography to yield **9** (15.7 mg, 41% yield) as a colorless oil.

**$^1H$  NMR (400 MHz,  $CDCl_3$ ):**  $\delta$  7.02 – 6.92 (m, 3H), 3.87 (brs, 2H), 3.44 (d,  $J$  = 2.6 Hz, 3H), 2.45 (q,  $J$  = 11.8, 10.2 Hz, 2H), 1.98 (dd,  $J$  = 14.1, 6.0 Hz, 1H), 1.74 (dd,  $J$  = 14.2, 5.1 Hz, 1H), 1.40 (s, 9H), 1.32 (s, 3H), 1.28 – 1.24 (m, 1H), 1.13 – 1.01 (m, 3H), 0.94 – 0.83 (m, 1H).  **$^{13}C$  NMR (101 MHz,  $CDCl_3$ ):**  $\delta$  180.3, 154.7, 147.8 (d,  $J$  = 243.9 Hz), 137.0 (d,  $J$  = 3.2 Hz), 129.5 (d,  $J$  = 7.4 Hz), 123.1 (d,  $J$  = 6.3 Hz), 118.5 (d,  $J$  = 3.0 Hz), 115.8 (d,  $J$  = 19.3 Hz), 79.2, 48.1 (d,  $J$  = 1.7 Hz), 44.5, 33.1, 33.0, 32.4, 28.7 (d,  $J$  = 5.7 Hz), 28.4, 26.4.  **$^{19}F$  NMR (377 MHz,  $CDCl_3$ ):**  $\delta$  -136.3. **HRMS (ESI):** Calcd for  $C_{21}H_{29}FN_2O_3Na$   $[M+Na]^+$ :399.2054, found 399.2049

**3-butyl-1,3-dimethylindolin-2-one (10)**

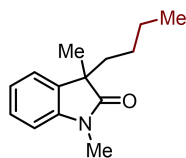

Prepared according to the *general procedure* from *N*-methyl-*N*-phenylmethacrylamide (17.5 mg, 0.1 mmol) and 1-iodopropane (25.5 mg, 0.15 mmol), The crude residue was purified by column chromatography to yield **10** (8.8 mg, 40% yield) as a colorless oil

**<sup>1</sup>H NMR (400 MHz, CDCl<sub>3</sub>):** δ 7.29 – 7.23 (m, 1H), 7.18 – 7.14 (m, 1H), 7.09 – 7.03 (m, 1H), 6.86 – 6.81 (m, 1H), 3.21 (s, 3H), 1.93 – 1.84 (m, 1H), 1.77 – 1.68 (m, 1H), 1.34 (s, 3H), 1.23 – 1.12 (m, 2H), 1.01 – 0.89 (m, 1H), 0.86 – 0.80 (m, 1H), 0.79 – 0.74 (m, 3H). **<sup>13</sup>C NMR (101 MHz, CDCl<sub>3</sub>):** δ 180.9, 143.3, 134.3, 127.5, 122.4, 122.4, 107.8, 48.4, 38.3, 26.6, 26.1, 23.8, 22.8, 13.8. **HRMS (ESI):** Calcd for C<sub>14</sub>H<sub>19</sub>NONa [M+Na]<sup>+</sup>:240.1359, found 240.1353

### 1,3-dimethyl-3-pentylindolin-2-one (11)

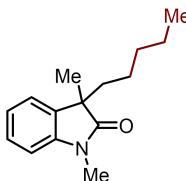

Prepared according to the *general procedure* from *N*-methyl-*N*-phenylmethacrylamide (17.5 mg, 0.1 mmol) and 1-iodobutane (27.6 mg, 0.15 mmol), The crude residue was purified by column chromatography to yield **11** (10.4 mg, 45% yield) as a colorless oil

**<sup>1</sup>H NMR (500 MHz, CDCl<sub>3</sub>):** δ 7.29 – 7.23 (m, 1H), 7.18 – 7.14 (m, 1H), 7.09 – 7.04 (m, 1H), 6.85 – 6.82 (m, 1H), 3.21 (s, 3H), 1.92 – 1.83 (m, 1H), 1.75 – 1.68 (m, 1H), 1.34 (s, 3H), 1.20 – 1.10 (m, 4H), 1.03 – 0.92 (m, 1H), 0.87 – 0.80 (m, 1H), 0.79 – 0.75 (m, 3H). **<sup>13</sup>C NMR (126 MHz, CDCl<sub>3</sub>):** δ 180.9, 143.3, 134.3, 127.5, 122.4, 122.4, 107.8, 48.4, 38.4, 31.9, 26.1, 24.1, 23.8, 22.3, 13.9. **HRMS (ESI):** Calcd for C<sub>15</sub>H<sub>21</sub>NONa [M+Na]<sup>+</sup>:254.1515, found 254.1518

### 3-(3-((tert-butyldimethylsilyl)oxy)propyl)-1,3-dimethylindolin-2-one (12)

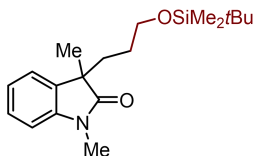

Prepared according to the *general procedure* from *N*-methyl-*N*-phenylmethacrylamide (17.5 mg, 0.1 mmol) and *tert*-butyl(2-iodoethoxy)dimethylsilane (42.9 mg, 0.15 mmol), The crude residue was purified by column chromatography to yield **12** (17.3 mg, 52% yield) as a colorless oil.

**<sup>1</sup>H NMR (400 MHz, CDCl<sub>3</sub>):** δ 7.29 – 7.21 (m, 1H), 7.18 – 7.14 (m, 1H), 7.08 – 7.03 (m, 1H), 6.86 – 6.79 (m, 1H), 3.50 – 3.39 (m, 2H), 3.20 (s, 3H), 1.93 – 1.76 (m, 2H), 1.35 (s, 3H), 1.28 – 1.15 (m, 1H), 1.11 – 1.01 (m, 1H), 0.84 (s, 9H), -0.02 – -0.05 (m,

6H). **<sup>13</sup>C NMR (101 MHz, CDCl<sub>3</sub>):** δ 180.6, 143.3, 134.0, 127.6, 122.5, 122.4, 107.8, 62.9, 48.1, 34.7, 27.8, 26.1, 25.9, 23.8, 18.3, -5.4, -5.4. **HRMS (ESI):** Calcd for C<sub>19</sub>H<sub>31</sub>NO<sub>2</sub>Na [M+Na]<sup>+</sup>:356.2016, found 356.2021

### 3-((4,4-difluorocyclohexyl)methyl)-1,3-dimethylindolin-2-one (13)

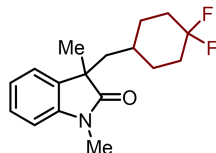

Prepared according to the *general procedure* from *N*-methyl-*N*-phenylmethacrylamide (17.5 mg, 0.1 mmol) and 1,1-difluoro-4-iodocyclohexane (36.9 mg, 0.15 mmol), The crude residue was purified by column chromatography to yield **13** (19.7 mg, 67% yield) as a colorless oil.

**<sup>1</sup>H NMR (400 MHz, CDCl<sub>3</sub>):** δ 7.32 – 7.25 (m, 1H), 7.16 (d, *J* = 7.3 Hz, 1H), 7.10 – 7.04 (m, 1H), 6.86 (d, *J* = 7.8 Hz, 1H), 3.23 (s, 3H), 2.01 (dd, *J* = 14.1, 5.8 Hz, 1H), 1.95 – 1.81 (m, 2H), 1.77 (dd, *J* = 14.1, 5.1 Hz, 1H), 1.51 – 1.39 (m, 3H), 1.33 (s, 3H), 1.28 – 1.19 (m, 2H), 1.13 – 1.01 (m, 2H). **<sup>13</sup>C NMR (101 MHz, CDCl<sub>3</sub>):** δ 180.6, 143.0, 133.9, 132.2 (t, *J* = 242.4 Hz), 127.9, 122.6, 122.6, 108.2, 47.8, 43.4 (d, *J* = 2.1 Hz), 33.1 (m, 2C), 32.8, 29.61 (dd, *J* = 54.6, 9.0 Hz, 2C), 26.2, 26.1. **<sup>19</sup>F NMR (377 MHz, CDCl<sub>3</sub>):** δ -92.4 (d, *J* = 234.6 Hz), -101.8 (d, *J* = 234.2 Hz). **HRMS (ESI):** Calcd for C<sub>17</sub>H<sub>21</sub>F<sub>2</sub>NONa [M+Na]<sup>+</sup>:316.1483, found 316.1484

### 1,3-dimethyl-3-((4-oxocyclohexyl)methyl)indolin-2-one (14)

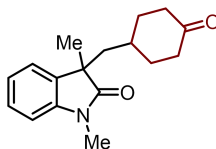

Prepared according to the *general procedure* from *N*-methyl-*N*-phenylmethacrylamide (17.5 mg, 0.1 mmol) and 4-iodocyclohexan-1-one (33.6 mg, 0.15 mmol), The crude residue was purified by column chromatography to yield **14** (23.0 mg, 85% yield) as a colorless oil.

**<sup>1</sup>H NMR (400 MHz, CDCl<sub>3</sub>):** δ 7.31 – 7.27 (m, 1H), 7.18 (d, *J* = 7.3 Hz, 1H), 7.11 – 7.06 (m, 1H), 6.88 (d, *J* = 7.8 Hz, 1H), 3.24 (s, 3H), 2.27 – 2.20 (m, 1H), 2.18 – 2.12 (m, 1H), 2.11 – 2.00 (m, 3H), 1.83 (dd, *J* = 14.1, 5.2 Hz, 1H), 1.77 – 1.70 (m, 1H), 1.56 – 1.48 (m, 1H), 1.44 – 1.31 (m, 5H), 1.31 – 1.16 (m, 2H). **<sup>13</sup>C NMR (101 MHz, CDCl<sub>3</sub>):** δ 211.6, 180.6, 143.0, 133.7, 127.9, 122.6, 122.6, 108.2, 47.8, 43.1, 40.4, 40.3, 33.6, 33.0, 33.0, 26.3, 26.1. **HRMS (ESI):** Calcd for C<sub>17</sub>H<sub>21</sub>NO<sub>2</sub>Na [M+Na]<sup>+</sup>:294.1464, found 294.1465

### 1,3-dimethyl-3-(oxetan-3-ylmethyl)indolin-2-one (15)

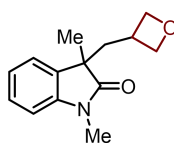



Prepared according to the **general procedure** from *N*-methyl-*N*-phenylmethacrylamide (17.5 mg, 0.1 mmol) and 3-iodooxetane (27.6 mg, 0.15 mmol), The crude residue was purified by column chromatography to yield **15** (22.2 mg, 96% yield) as a colorless oil.

**<sup>1</sup>H NMR (400 MHz, CDCl<sub>3</sub>):** δ 7.29 – 7.24 (m, 1H), 7.16 (d, *J* = 7.2 Hz, 1H), 7.08 – 7.03 (m, 1H), 6.85 – 6.81 (m, 1H), 4.50 (dd, *J* = 8.0, 6.0 Hz, 1H), 4.40 – 4.32 (m, 1H), 4.15 – 4.06 (m, 2H), 3.20 (s, 3H), 2.75 (dt, *J* = 14.9, 7.4 Hz, 1H), 2.26 (dd, *J* = 13.7, 6.2 Hz, 1H), 2.12 (dd, *J* = 13.7, 8.2 Hz, 1H), 1.35 (s, 3H). **<sup>13</sup>C NMR (101 MHz, CDCl<sub>3</sub>):** δ 180.0, 143.0, 132.9, 128.1, 122.7, 122.5, 108.0, 77.6, 77.4, 47.4, 42.0, 32.1, 26.1, 23.3. **HRMS (ESI):** Calcd for C<sub>14</sub>H<sub>17</sub>NO<sub>2</sub>Na [M+Na]<sup>+</sup>:254.1152, found 254.1149

### *tert*-butyl

#### 6-((1,3-dimethyl-2-oxoindolin-3-yl)methyl)-2-azaspiro[3.3]heptane-2-carboxylate (**16**)

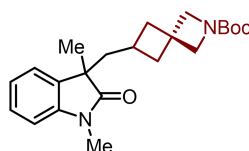

Prepared according to the **general procedure** from *N*-methyl-*N*-phenylmethacrylamide (17.5 mg, 0.1 mmol) and *tert*-butyl 6-iodo-2-azaspiro[3.3]heptane-2-carboxylate (48.5 mg, 0.15 mmol), The crude residue was purified by column chromatography to yield **16** (25.0 mg, 67% yield) as a colorless oil.

**<sup>1</sup>H NMR (400 MHz, CDCl<sub>3</sub>):** δ 7.29 – 7.23 (m, 1H), 7.13 (d, *J* = 7.2 Hz, 1H), 7.08 – 7.02 (m, 1H), 6.83 (d, *J* = 7.7 Hz, 1H), 3.75 – 3.67 (m, 2H), 3.67 – 3.59 (m, 2H), 3.19 (s, 3H), 2.02 (dd, *J* = 13.5, 6.3 Hz, 1H), 1.92 (dd, *J* = 9.9, 5.6 Hz, 1H), 1.83 (dd, *J* = 13.5, 5.8 Hz, 1H), 1.78 – 1.70 (m, 3H), 1.54 – 1.48 (m, 1H), 1.45 – 1.41 (m, 1H), 1.37 (s, 4H), 1.31 (s, 3H). **<sup>13</sup>C NMR (101 MHz, CDCl<sub>3</sub>):** δ 180.4, 156.1, 143.1, 133.6, 127.8, 122.7, 122.3, 107.9, 79.0, 47.8, 45.0, 39.7, 39.1, 34.4, 28.3, 26.6, 26.1, 24.0. **HRMS (ESI):** Calcd for C<sub>22</sub>H<sub>30</sub>N<sub>2</sub>O<sub>3</sub>Na [M+Na]<sup>+</sup>:393.2149, found 393.2144

#### 1,3-dimethyl-3-((2-oxohexahydro-2H-3,5-methanocyclopenta[b]furan-6-yl)methyl)indolin-2-one (**17**)

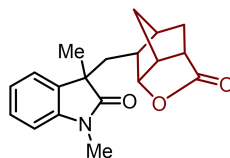

Prepared according to the **general procedure** from *N*-methyl-*N*-phenylmethacrylamide (17.5 mg, 0.1 mmol) and 6-iodohexahydro-2H-3,5-methanocyclopenta[b]furan-2-one (39.6 mg, 0.15 mmol), The crude residue was purified by column chromatography to yield **17** (29.7 mg, 95% yield, d.r. = 1:1) as a colorless oil.

**<sup>1</sup>H NMR (400 MHz, CDCl<sub>3</sub>, diastereomers):** δ 7.32 – 7.27 (m, 1H), 7.20 – 7.13 (m, 1H), 7.11 – 7.05 (m, 1H), 6.88 (d, *J* = 7.8 Hz, 1H), 4.51 – 3.99 (m, 1H), 3.24 – 3.23 (m, 3H), 3.04 – 2.95 (m, 1H), 2.41 – 2.34 (m, 1H), 2.01 – 1.88 (m, 2H), 1.84 – 1.60

(m, 3H), 1.47 – 1.38 (m, 2H), 1.37 – 1.34 (m, 3H), 1.22 – 0.94 (m, 1H). **<sup>13</sup>C NMR (101 MHz, CDCl<sub>3</sub>, diastereomers):** δ 181.1, 180.9, 180.3, 180.2, 143.4, 143.0, 133.0, 132.8, 128.3, 128.2, 122.8, 122.7, 122.6, 122.3, 108.5, 108.5, 86.5, 85.5, 47.8, 47.3, 46.3, 46.1, 45.9, 45.4, 43.4, 41.6, 41.1, 40.6, 38.6, 35.2, 35.0, 34.9, 34.8, 26.3, 26.2, 24.9, 24.0. **HRMS (ESI):** Calcd for C<sub>19</sub>H<sub>21</sub>NO<sub>3</sub>Na [M+Na]<sup>+</sup>:334.1414, found 334.1409

### 1,3-dimethyl-3-(2-(tetrahydro-2H-pyran-4-yl)propyl)indolin-2-one (18)

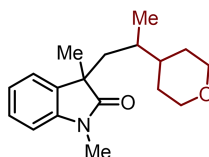

Prepared according to the *general procedure* from *N*-methyl-*N*-phenylmethacrylamide (17.5 mg, 0.1 mmol) and (4-(1-iodoethyl)tetrahydro-2H-pyran (36.0 mg, 0.15 mmol), The crude residue was purified by column chromatography to yield **18** (20.7 mg, 72% yield, d.r. = 1:1) as a colorless oil.

**<sup>1</sup>H NMR (400 MHz, CDCl<sub>3</sub>, diastereomers):** δ 7.30 – 7.24 (m, 1H), 7.20 – 7.11 (m, 1H), 7.09 – 7.03 (m, 1H), 6.87 – 6.82 (m, 1H), 3.93 (dd, *J* = 20.8, 7.6 Hz, 2H), 3.30 – 3.15 (m, 5H), 1.94 – 1.82 (m, 1H), 1.66 – 1.58 (m, 1H), 1.34 (s, 3H), 1.30 – 1.19 (m, 4H), 1.17 – 1.07 (m, 1H), 1.05 – 0.91 (m, 1H), 0.63 – 0.42 (m, 3H). **<sup>13</sup>C NMR (101 MHz, CDCl<sub>3</sub>, diastereomers):** δ 181.1, 180.6, 143.3, 143.1, 134.3, 133.8, 127.7, 123.0, 122.7, 122.4, 122.3, 108.0, 108.0, 68.5, 68.4, 68.3, 48.2, 47.8, 42.6, 41.7, 41.1, 40.8, 34.6, 34.4, 30.4, 29.9, 28.8, 27.8, 26.2, 26.1, 26.0, 25.5, 17.0, 16.3. **HRMS (ESI):** Calcd for C<sub>18</sub>H<sub>25</sub>NO<sub>2</sub>Na [M+Na]<sup>+</sup>:310.1778, found 310.1770

### 3-(2-ethylhexyl)-1,3-dimethylindolin-2-one (19)

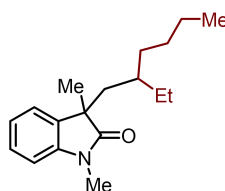

Prepared according to the *general procedure* from *N*-methyl-*N*-phenylmethacrylamide (17.5 mg, 0.1 mmol) and 3-iodoheptane (33.9 mg, 0.15 mmol), The crude residue was purified by column chromatography to yield **19** (20.2 mg, 74% yield, d.r. = 1:1) as a colorless oil.

**<sup>1</sup>H NMR (400 MHz, CDCl<sub>3</sub>, diastereomers):** δ 7.29 – 7.23 (m, 1H), 7.16 (d, *J* = 7.3 Hz, 1H), 7.08 – 7.02 (m, 1H), 6.83 (d, *J* = 7.7 Hz, 1H), 3.24 – 3.17 (m, 3H), 1.97 – 1.86 (m, 1H), 1.80 – 1.70 (m, 1H), 1.33 (s, 3H), 1.15 – 1.06 (m, 3H), 1.05 – 0.95 (m, 5H), 0.93 – 0.84 (m, 2H), 0.81 – 0.74 (m, 3H), 0.71 – 0.62 (m, 3H). **<sup>13</sup>C NMR (101 MHz, CDCl<sub>3</sub>, diastereomers):** δ 181.1, 143.3, 134.3, 127.5, 122.9, 122.8, 122.2, 122.2, 107.8, 76.7, 48.1, 48.0, 42.0, 41.9, 35.7, 35.6, 33.2, 32.7, 28.2, 28.2, 26.4, 26.1, 26.1, 25.6, 25.5, 22.8, 22.7, 14.0, 10.3, 10.3. **HRMS (ESI):** Calcd for C<sub>18</sub>H<sub>27</sub>NONa [M+Na]<sup>+</sup>:296.1985, found 296.1982

### 1,3-dimethyl-3-((1-methylcyclohexyl)methyl)indolin-2-one (**20**)

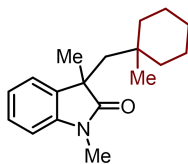

Prepared according to the *general procedure* from *N*-methyl-*N*-phenylmethacrylamide (17.5 mg, 0.1 mmol) and 1-iodo-1-methylcyclohexane (33.6 mg, 0.15 mmol). The crude residue was purified by column chromatography to yield **20** (17.0 mg, 63% yield) as a colorless oil.

**<sup>1</sup>H NMR (400 MHz, CDCl<sub>3</sub>):** δ 7.28 – 7.23 (m, 1H), 7.21 (d, *J* = 7.3 Hz, 1H), 7.05 – 7.00 (m, 1H), 6.84 (d, *J* = 7.7 Hz, 1H), 3.22 (s, 3H), 2.10 (d, *J* = 14.5 Hz, 1H), 1.92 (d, *J* = 14.5 Hz, 1H), 1.39 – 1.32 (m, 2H), 1.29 (s, 3H), 1.26 – 1.22 (m, 1H), 1.20 – 1.11 (m, 2H), 1.05 – 0.97 (m, 1H), 0.92 – 0.84 (m, 2H), 0.49 (s, 3H). **<sup>13</sup>C NMR (101 MHz, CDCl<sub>3</sub>):** δ 181.2, 142.7, 134.5, 127.4, 123.8, 121.9, 108.0, 47.0, 39.1, 38.9, 34.2, 28.6, 26.2, 26.2, 21.9, 21.8. **HRMS (ESI):** Calcd for C<sub>18</sub>H<sub>25</sub>NONa [M+Na]<sup>+</sup>:294.1828, found 294.1825

### 3-(adamantan-1-yl)methyl-1,3-dimethylindolin-2-one (**21**)

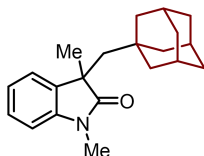

Prepared according to the *general procedure* from *N*-methyl-*N*-phenylmethacrylamide (17.5 mg, 0.1 mmol) and 1-iodoadamantane (39.3 mg, 0.15 mmol). The crude residue was purified by column chromatography to yield **21** (30.9 mg, 99% yield) as a white solid.

**<sup>1</sup>H NMR (400 MHz, CDCl<sub>3</sub>):** δ 7.28 – 7.22 (m, 1H), 7.18 (d, *J* = 7.2 Hz, 1H), 7.05 – 7.00 (m, 1H), 6.84 (d, *J* = 7.8 Hz, 1H), 3.23 (s, 3H), 1.99 (d, *J* = 14.5 Hz, 1H), 1.76 – 1.69 (m, 4H), 1.50 (d, *J* = 12.0 Hz, 3H), 1.37 (d, *J* = 11.6 Hz, 3H), 1.26 (s, 3H), 1.21 – 1.10 (m, 6H). **<sup>13</sup>C NMR (101 MHz, CDCl<sub>3</sub>):** δ 181.2, 142.6, 134.7, 127.5, 123.6, 122.0, 107.9, 52.0, 46.6, 43.3, 36.7, 33.9, 28.6, 28.5, 26.2. **HRMS (ESI):** Calcd for C<sub>21</sub>H<sub>27</sub>NONa [M+Na]<sup>+</sup>:332.1985, found 332.1980

All other spectroscopic analyses were in agreement with the literature<sup>1</sup>.

### 1,3-dimethyl-3-(2-(2,2,7,7-tetramethyltetrahydro-5H-bis([1,3]dioxolo)[4,5-b:4',5'-d]pyran-5-yl)ethyl)indolin-2-one (**22**)

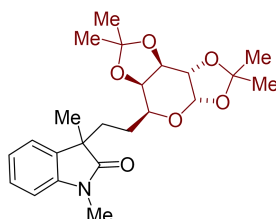

Prepared according to the *general procedure* from *N*-methyl-*N*-phenylmethacrylamide (17.5 mg, 0.1 mmol) and 5-iodo-2,2,7,7-tetramethyltetrahydro-5H-bis([1,3]d

ioxolo)[4,5-b:4', 5'-d]pyran (53.4 mg, 0.15 mmol), The crude residue was purified by column chromatography to yield **22** (32.5 mg, 78% yield, d.r. = 1:1) as a white solid.

**<sup>1</sup>H NMR (400 MHz, CDCl<sub>3</sub>, diastereomers):** δ 7.26 – 7.15 (m, 2H), 7.07 – 7.02 (m, 1H), 6.81 (d, J = 7.7 Hz, 1H), 5.50 – 5.42 (m, 1H), 4.55 – 4.47 (m, 1H), 4.26 – 4.21 (m, 1H), 4.06 – 3.94 (m, 1H), 3.62 – 3.53 (m, 1H), 3.20 (d, J = 3.4 Hz, 3H), 2.14 – 2.02 (m, 1H), 1.90 – 1.67 (m, 1H), 1.77 – 1.67 (m, 1H), 1.50 (d, J = 12.9 Hz, 3H), 1.36 (d, J = 4.3 Hz, 5H), 1.32 – 1.28 (m, 6H), 1.26 – 1.24 (m, 2H). **<sup>13</sup>C NMR (101 MHz, CDCl<sub>3</sub>, diastereomers):** δ 180.64, 180.50, 143.24, 143.15, 133.96, 133.66, 127.64, 127.59, 122.74, 122.69, 122.59, 122.33, 108.97, 108.93, 108.33, 108.24, 107.96, 107.93, 96.46, 96.39, 72.75, 72.23, 70.83, 70.80, 70.45, 70.35, 67.95, 67.69, 48.24, 47.89, 34.71, 34.18, 26.15, 26.14, 26.08, 26.04, 25.91, 25.80, 25.14, 24.99, 24.89, 24.85, 24.50, 24.41, 24.30, 23.32. **HRMS (ESI):** Calcd for C<sub>23</sub>H<sub>31</sub>NO<sub>6</sub>Na [M+Na]<sup>+</sup>: 440.2044, found 440.2045

**(3S)-3-(((8R,9S,13S,14S)-17-acetyl-13-methyl-2,3,4,7,8,9,10,11,12,13,14,15,16,17-tetradecahydro-1H-cyclopenta[a]phenanthren-3-yl)methyl)-1,3-dimethylindolin-2-one (23)**

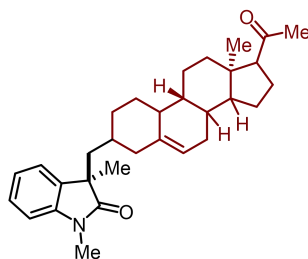

Prepared according to the *general procedure* from N-methyl-N-phenylmethacrylamide (17.5 mg, 0.1 mmol) and 3-iodo-13-methyl-2,3,4,7,8,9,10,11,12,13,14,15,16,17-tetradecahydro-1H-cyclopenta[a]phenanthren-17-yl)ethan-1-one (61.8 mg, 0.15 mmol), The crude residue was purified by column chromatography to yield **23** (31.9 mg, 69% yield, d.r. = 1:1.3:1:1) as a white solid.

**<sup>1</sup>H NMR (400 MHz, CDCl<sub>3</sub>, diastereomers):** δ 7.39 – 6.82 (m, 4H), 5.31 – 4.97 (m, 1H), 3.42 – 3.15 (m, 3H), 2.61 – 2.46 (m, 1H), 2.30 – 0.57 (m, 32H). **<sup>13</sup>C NMR (101 MHz, CDCl<sub>3</sub>, diastereomers):** δ 209.7, 181.1, 180.9, 180.7, 143.3, 143.2, 143.1, 142.9, 142.6, 140.3, 139.8, 134.4, 134.3, 134.0, 129.2, 127.6, 127.6, 127.6, 126.9, 126.5, 122.9, 122.8, 122.7, 122.5, 122.4, 122.3, 122.2, 121.5, 121.0, 119.3, 119.1, 119.0, 107.9, 107.9, 107.8, 63.7, 63.7, 57.0, 56.9, 50.2, 50.0, 48.2, 48.2, 47.7, 45.3, 45.1, 44.0, 44.0, 43.9, 40.4, 39.8, 39.4, 39.2, 39.1, 38.9, 38.8, 38.0, 37.8, 37.1, 37.1, 36.7, 36.6, 36.6, 36.5, 34.1, 34.0, 31.7, 31.7, 31.6, 31.6, 31.5, 31.5, 31.4, 31.1, 30.1, 29.1, 27.2, 26.9, 26.2, 26.2, 26.1, 26.1, 25.9, 25.6, 25.0, 24.4, 24.4, 22.8, 22.7, 20.8, 20.7, 20.3, 19.3, 19.2, 19.2, 13.2, 13.2, 13.1. **HRMS (ESI):** Calcd for C<sub>32</sub>H<sub>43</sub>NO<sub>2</sub>Na [M+Na]<sup>+</sup>: 496.3186, found 496.3195

**tert-butyl 4-(2-oxo-2H-chromen-4-yl)piperidine-1-carboxylate (24)**

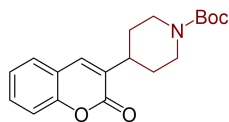

Prepared according to the **general procedure** from 2H-chromen-2-one (14.6 mg, 0.1 mmol) and *tert*-butyl 4-iodopiperidine-1-carboxylate (46.7 mg, 0.15 mmol). The crude residue was purified by column chromatography to yield **24** (15.5 mg, 47% yield) as a white solid.

**<sup>1</sup>H NMR (400 MHz, CDCl<sub>3</sub>):** δ 7.51 – 7.41 (m, 3H), 7.34 – 7.23 (m, 2H), 4.31 (s, 2H), 2.97 – 2.73 (m, 3H), 1.94 (m, 2H), 1.55 – 1.41 (m, 11H). **<sup>13</sup>C NMR (101 MHz, CDCl<sub>3</sub>):** δ 161.3, 154.7, 152.8, 136.9, 132.8, 130.9, 127.5, 124.4, 119.3, 116.4, 79.6, 43.9, 36.5, 30.8, 28.4. **HRMS (ESI):** Calcd for C<sub>19</sub>H<sub>23</sub>NO<sub>4</sub>Na [M+Na]<sup>+</sup>:352.1519, found 352.1528

All other spectroscopic analyses were in agreement with the literature<sup>4</sup>.

### 3. Mechanistic study

#### 3.1 TEMPO trapping experiments

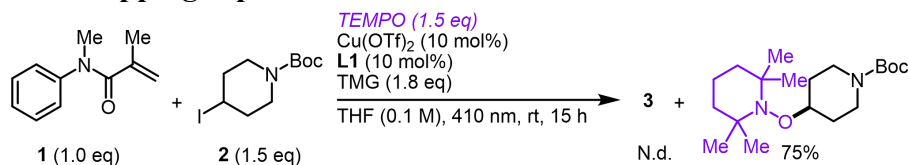

**Experimental Procedure:** To an oven-dried 10ml reaction vial were added Cu(OTf)<sub>2</sub> (3.72 mg, 0.01 mmol, 10 mol%), **L1** (3.55 mg, 0.01 mmol, 10 mol%), and 1 mL THF in a nitrogen-filled glove box. The resulting mixture was stirred for 5 min, followed by adding 1,1,3,3-Tetramethylguanidine (22.6  $\mu$ L, 0.18 mmol, 1.8 equiv), with tert-butyl 4-iodopiperidine-1-carboxylate (46.7 mg, 0.15 mmol, 1.5 equiv), N-methyl-N-phenylmethacrylamide (17.5 mg, 0.1 mmol, 1.5 equiv), TEMPO (23.4 mg, 0.15 mmol, 1.5 equiv) in sequence, and sealed with a screwed cap. The sealed vial was placed on a photo-reactor under irradiation of LEDs (410 nm, 6W). The mixture was stirred at 25 °C for 15 h, quenched with H<sub>2</sub>O, and extracted with ethyl acetate. The combined organic layers were dried over anhydrous Na<sub>2</sub>SO<sub>4</sub>, concentrated in vacuum. The crude product was analyzed by <sup>1</sup>H NMR, with 13.5-Timethoxybenzene as an internal standard.

#### 3.2 Radical clock experiments: involvement of alkyl radicals

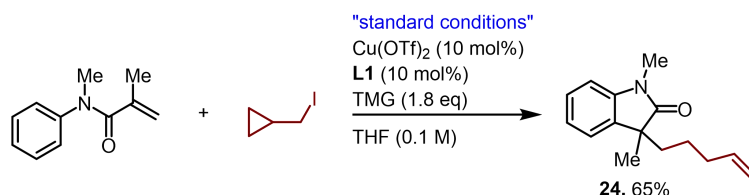

**Experimental Procedure:** To an oven-dried 10ml reaction vial were added Cu(OTf)<sub>2</sub> (3.72 mg, 0.01 mmol, 10 mol%), **L1** (3.55 mg, 0.01 mmol, 10 mol%), and 1 mL THF in a nitrogen-filled glove box. The resulting mixture was stirred for 5 min, followed by adding 1,1,3,3-Tetramethylguanidine (22.6  $\mu$ L, 0.18 mmol, 1.8 equiv), with N-methyl-N-phenylmethacrylamide (17.5 mg, 0.1 mmol, 1.0 equiv), (iodomethyl)cyclopropane (27.3 mg, 0.15 mol, 1.5 equiv) in sequence and sealed with a screwed cap. The sealed vial was placed on a photo reactor under irradiation of LEDs (410 nm, 6 W). The mixture was stirred at 25 °C for 15 h, quenched with H<sub>2</sub>O, and extracted with ethyl acetate. The crude product was purified by silica gel column chromatography to afford the product **25** (14.9 mg, 65% yield).

##### 1,3-dimethyl-3-(pent-4-en-1-yl)indolin-2-one (**25**)

**<sup>1</sup>H NMR (400 MHz, CDCl<sub>3</sub>):**  $\delta$  7.30 – 7.23 (m, 1H), 7.17 (d, *J* = 7.5 Hz, 1H), 7.09 – 7.04 (m, 1H), 6.84 (d, *J* = 8.5 Hz, 1H), 5.69 – 5.60 (m, 1H), 4.94 – 4.85 (m, 2H), 3.21 (s, 3H), 1.97 – 1.86 (m, 3H), 1.77 – 1.70 (m, 1H), 1.35 (s, 3H), 1.14 – 1.04 (m, 1H), 0.97 – 0.89 (m, 1H). **<sup>13</sup>C NMR (101 MHz, CDCl<sub>3</sub>):**  $\delta$  181.3, 144.4, 138.2, 134.1, 127.6, 122.4, 115.4, 108.7, 49.6, 37.9, 34.4, 27.6, 23.7. **HRMS (ESI):** Calcd for C<sub>15</sub>H<sub>19</sub>NONa [M+Na]<sup>+</sup>: 252.1359, found 252.1362

### 3.3 Attempted reaction

Using unactivated bromides and chlorides as electrophiles.

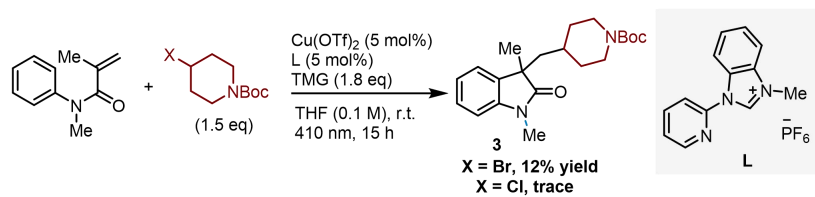

## 4. NMR Spectra

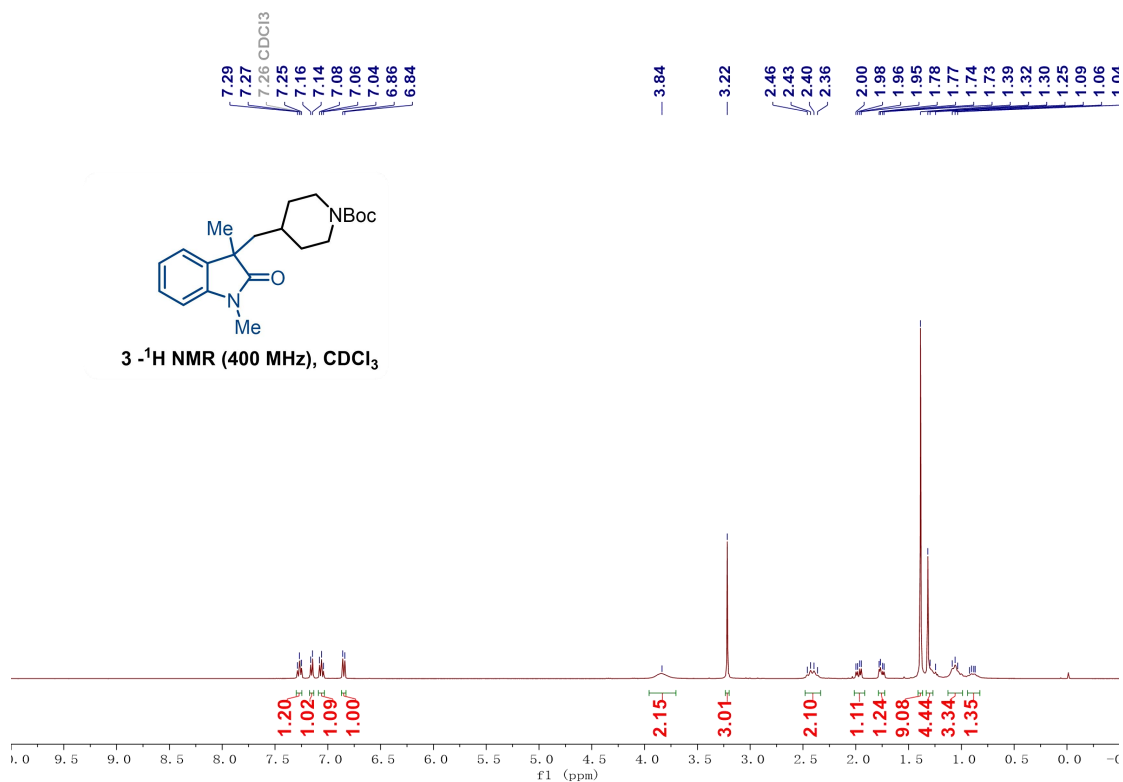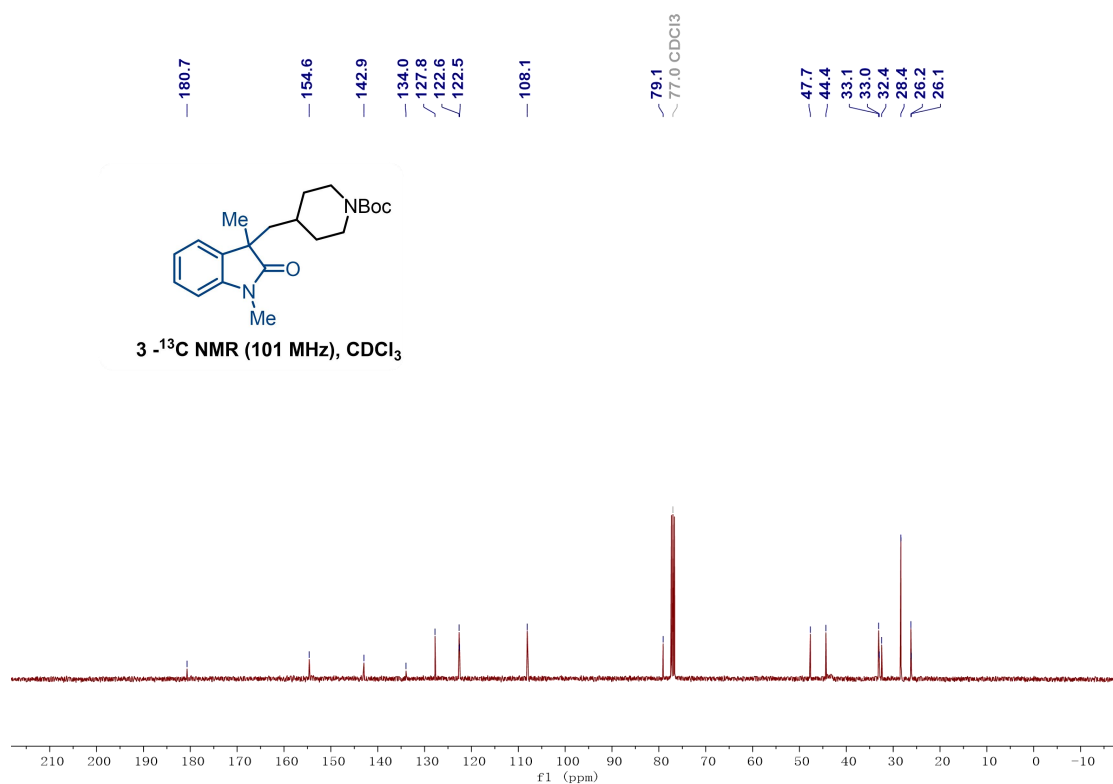



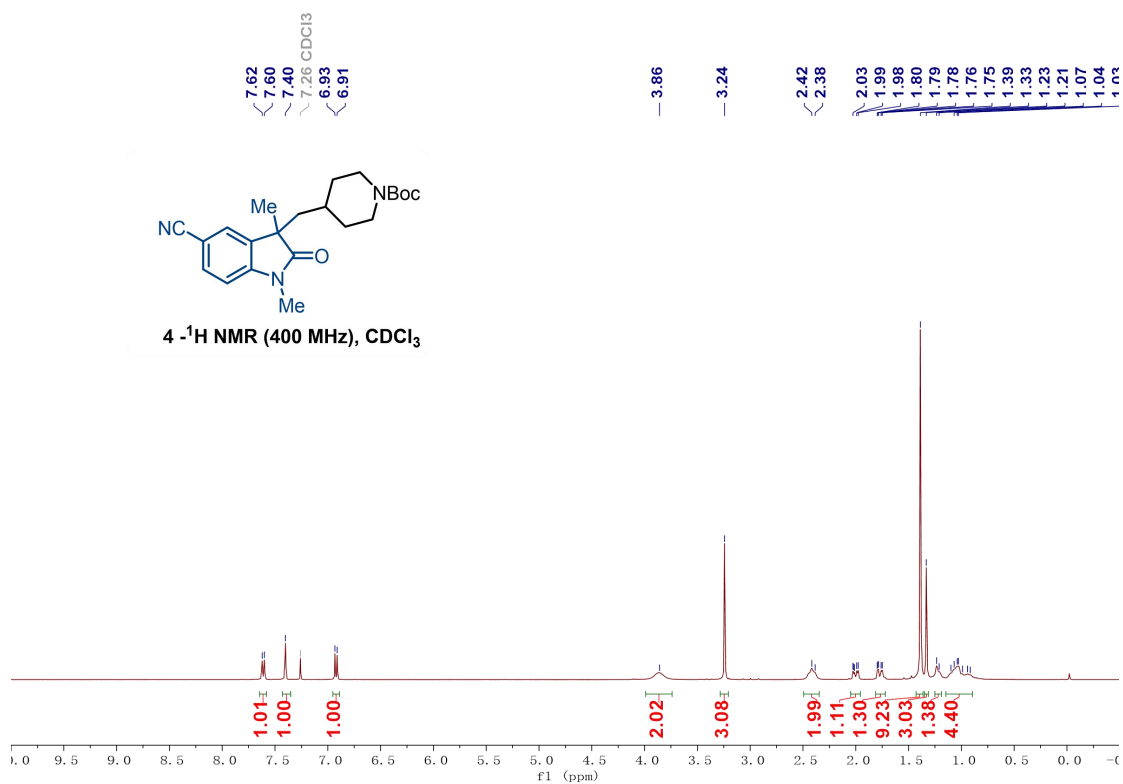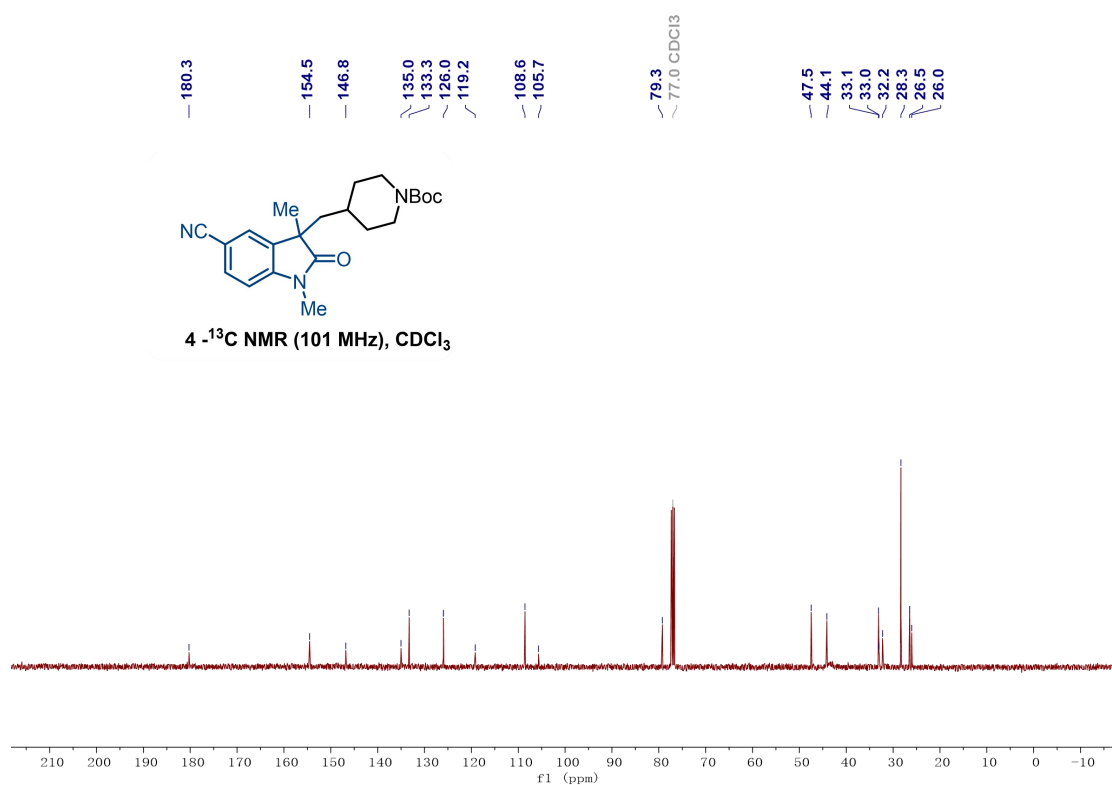

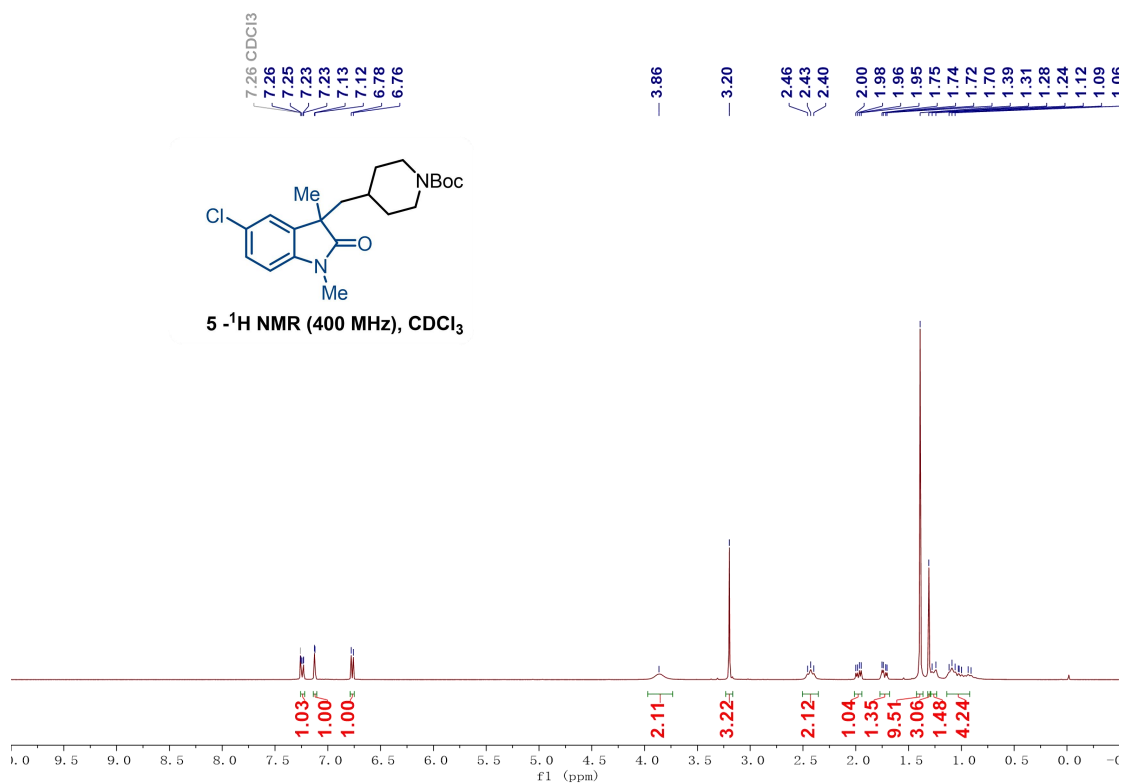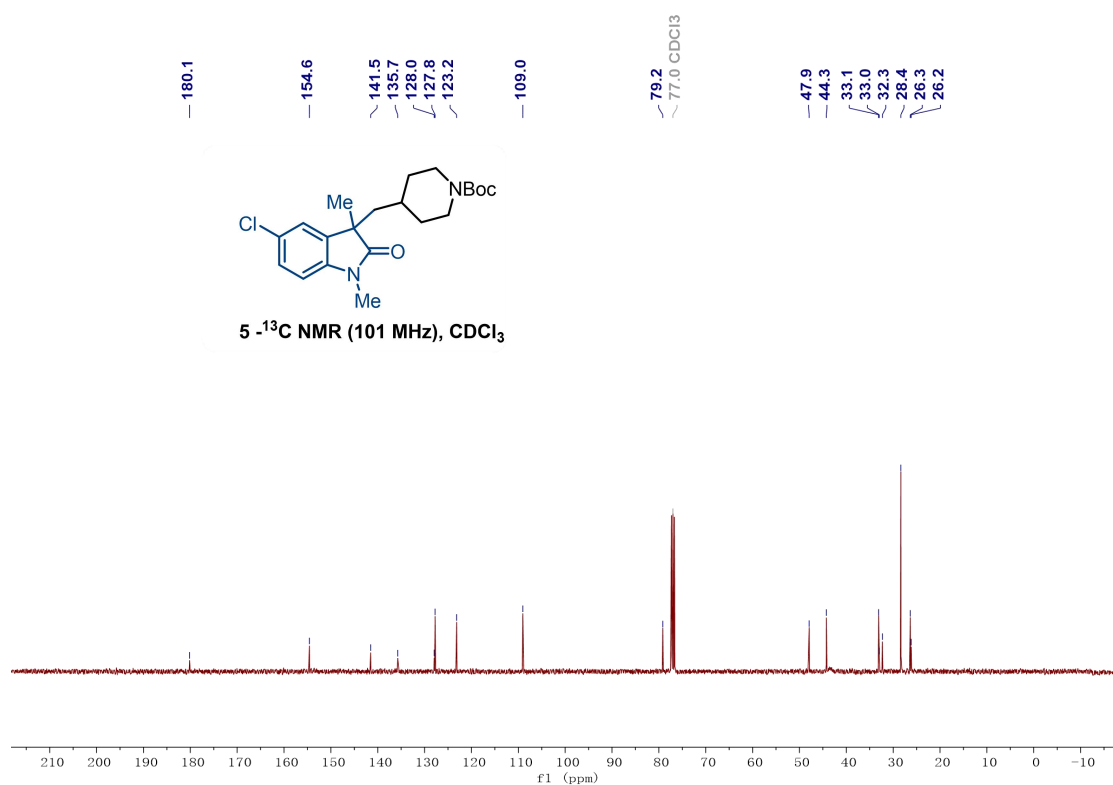

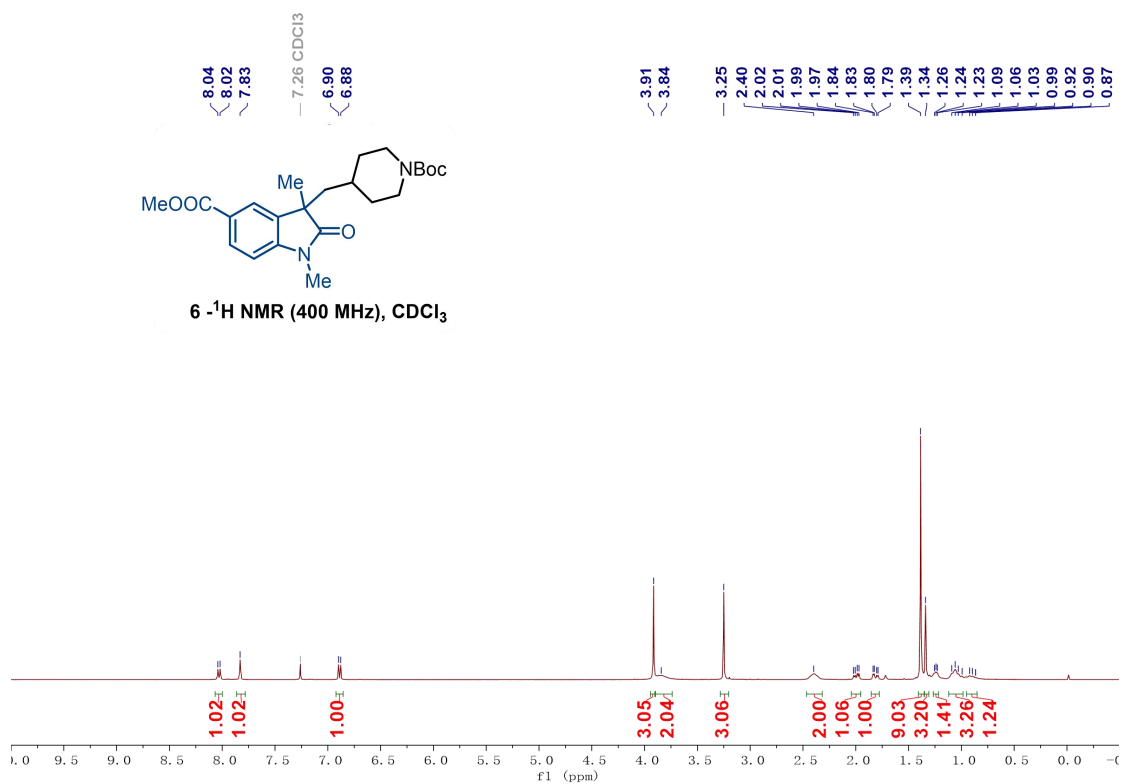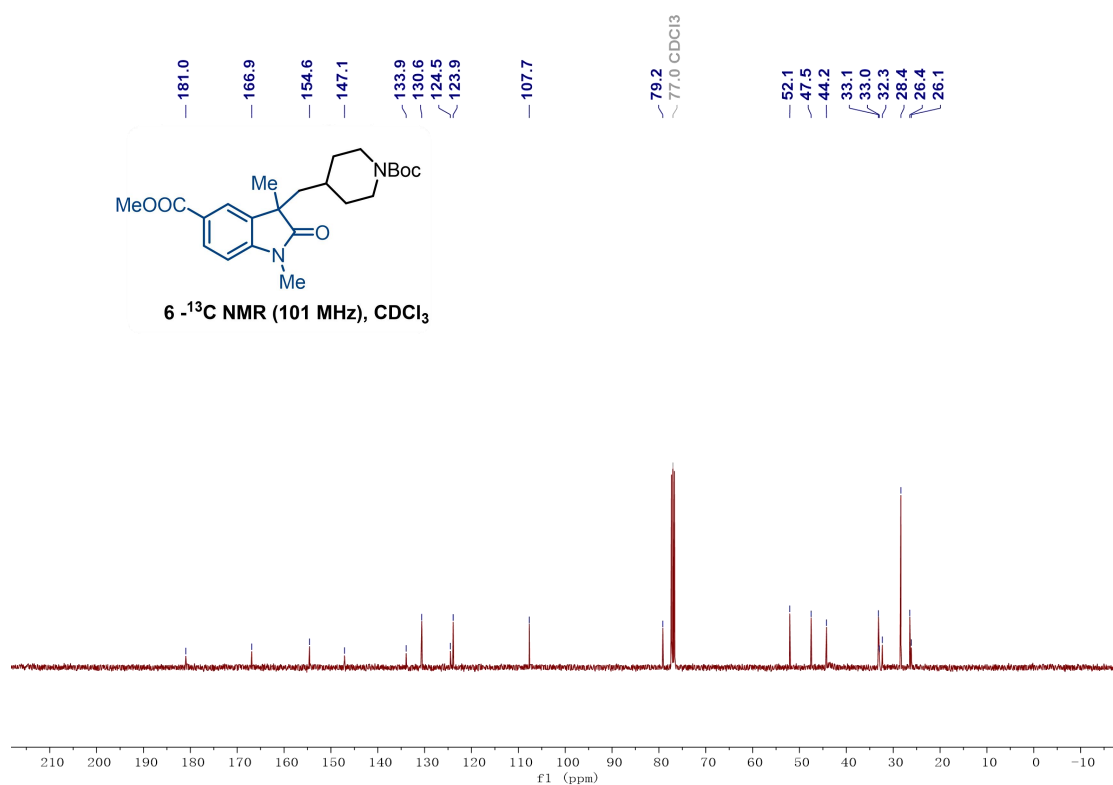

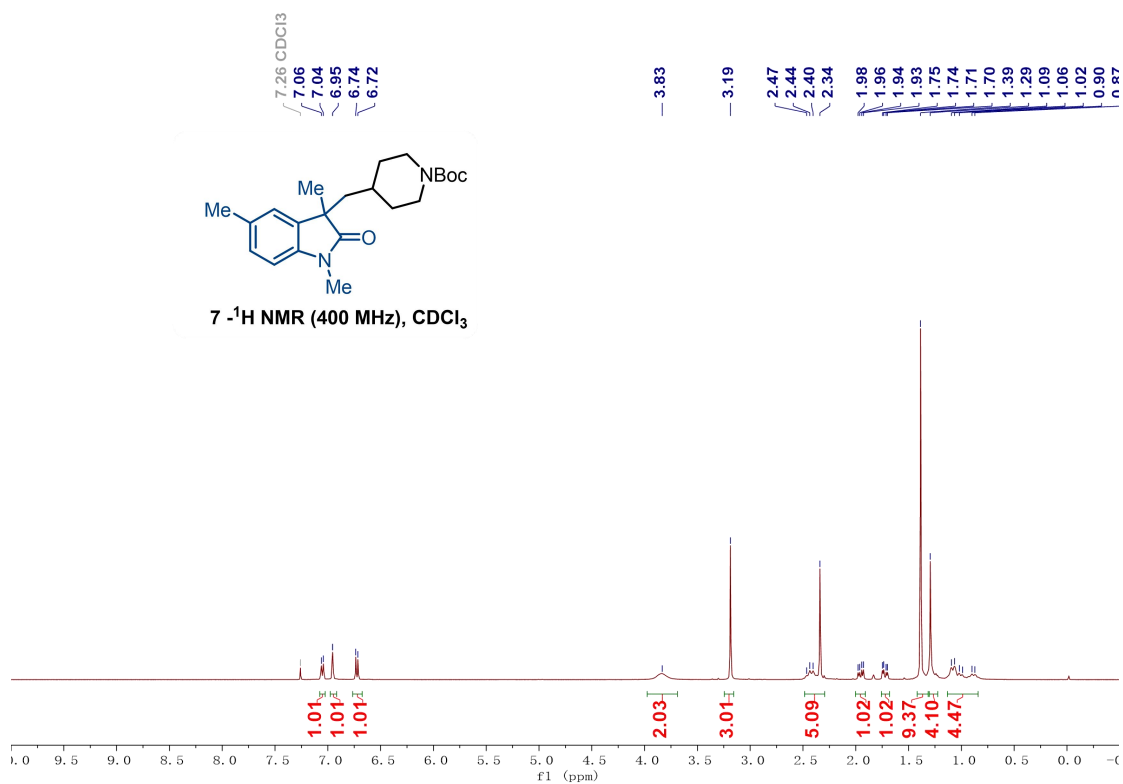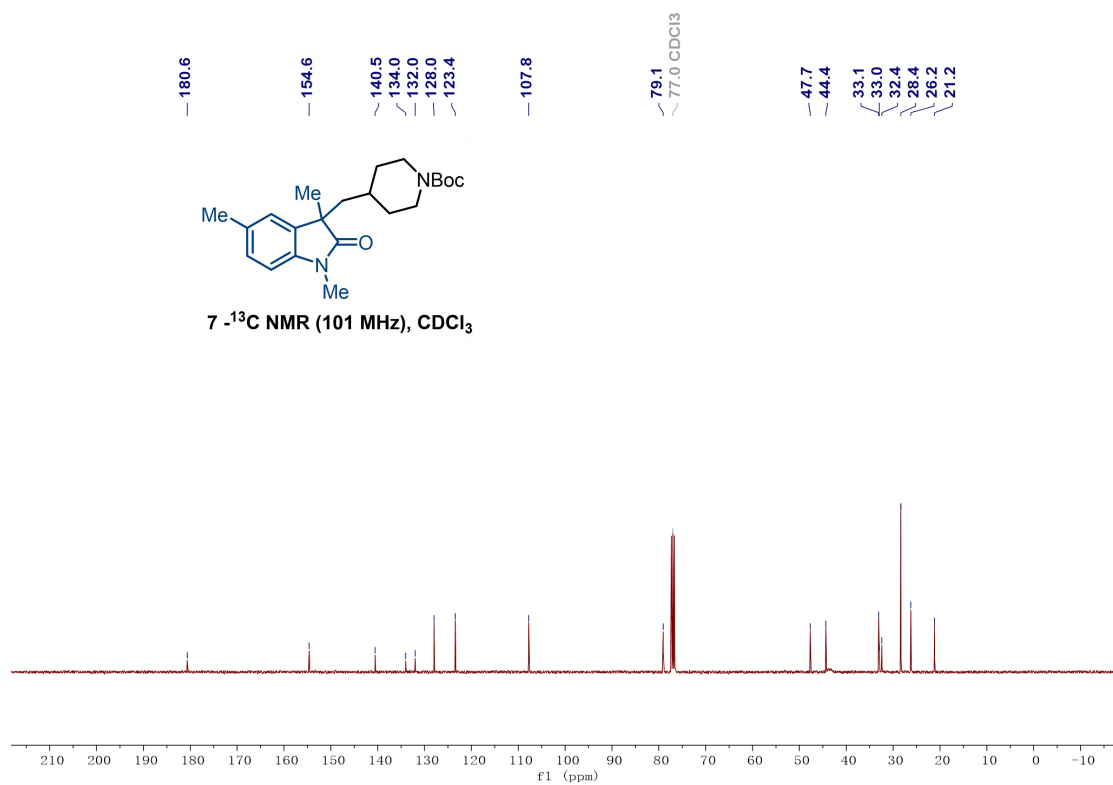

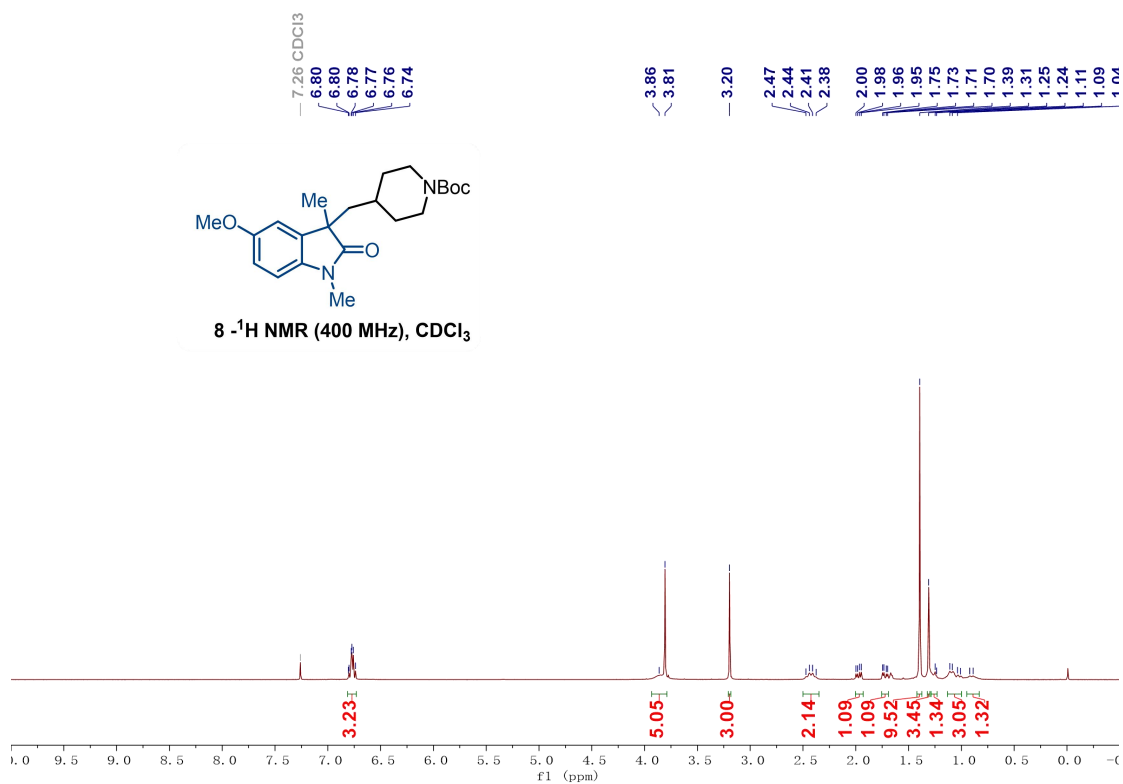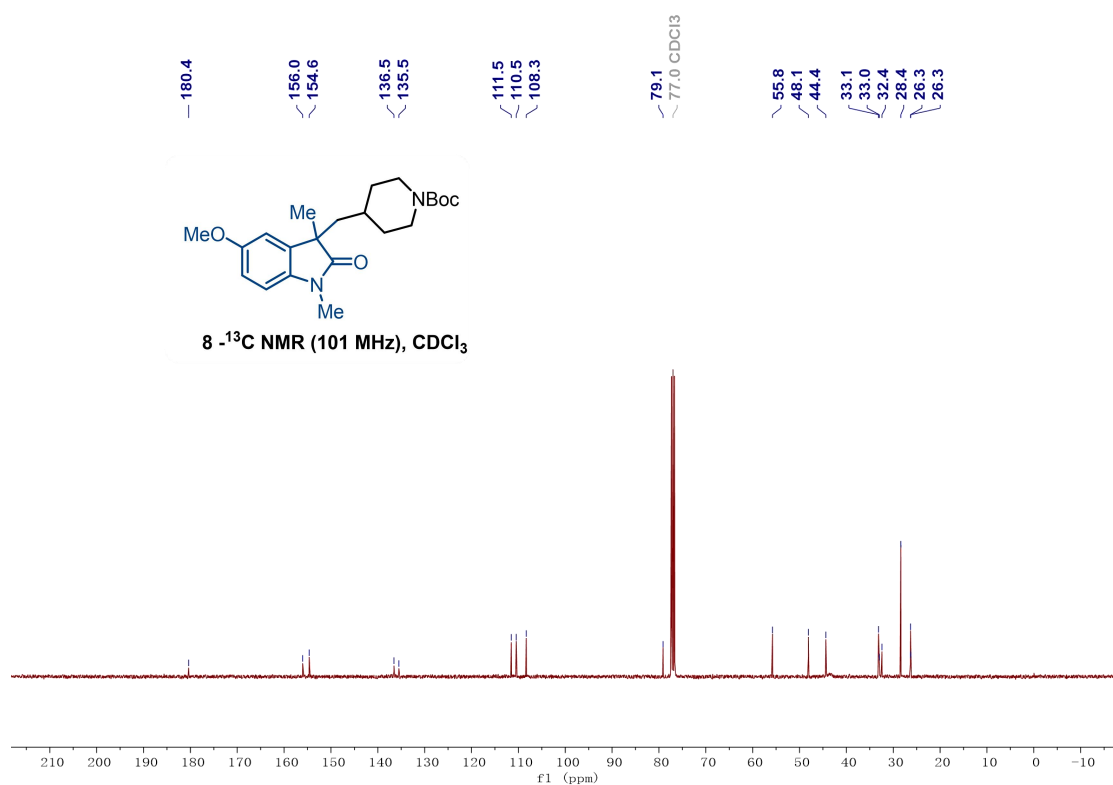

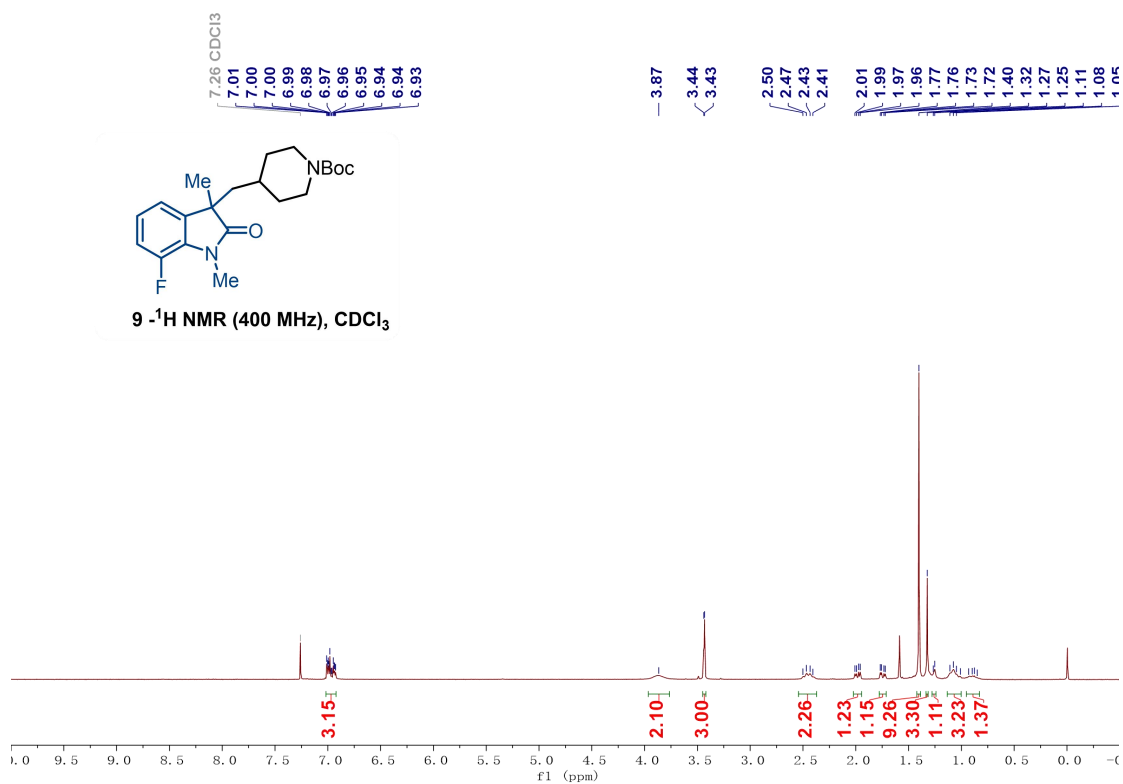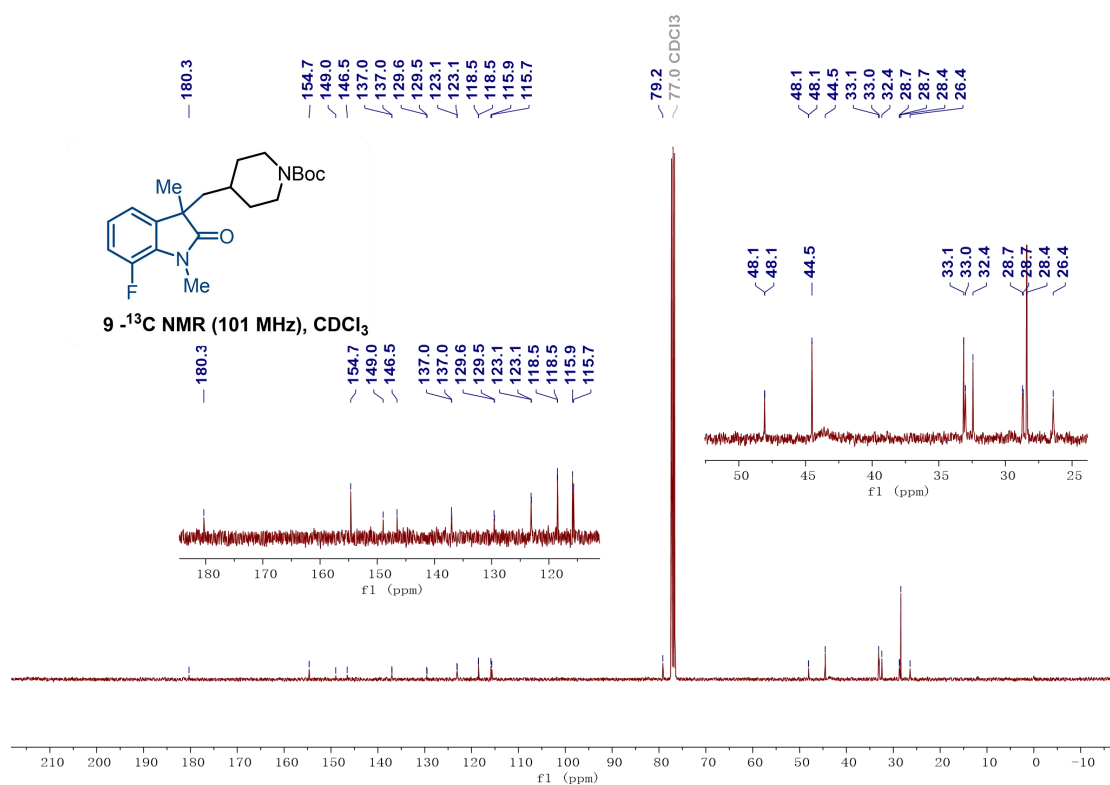

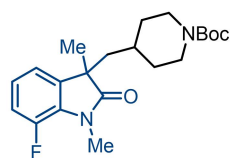

**9**  $^{19}\text{F}$  NMR (377 MHz),  $\text{CDCl}_3$

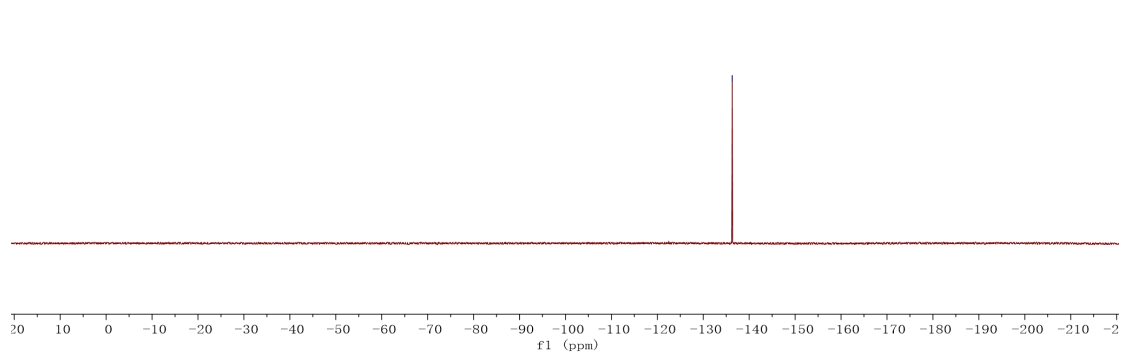

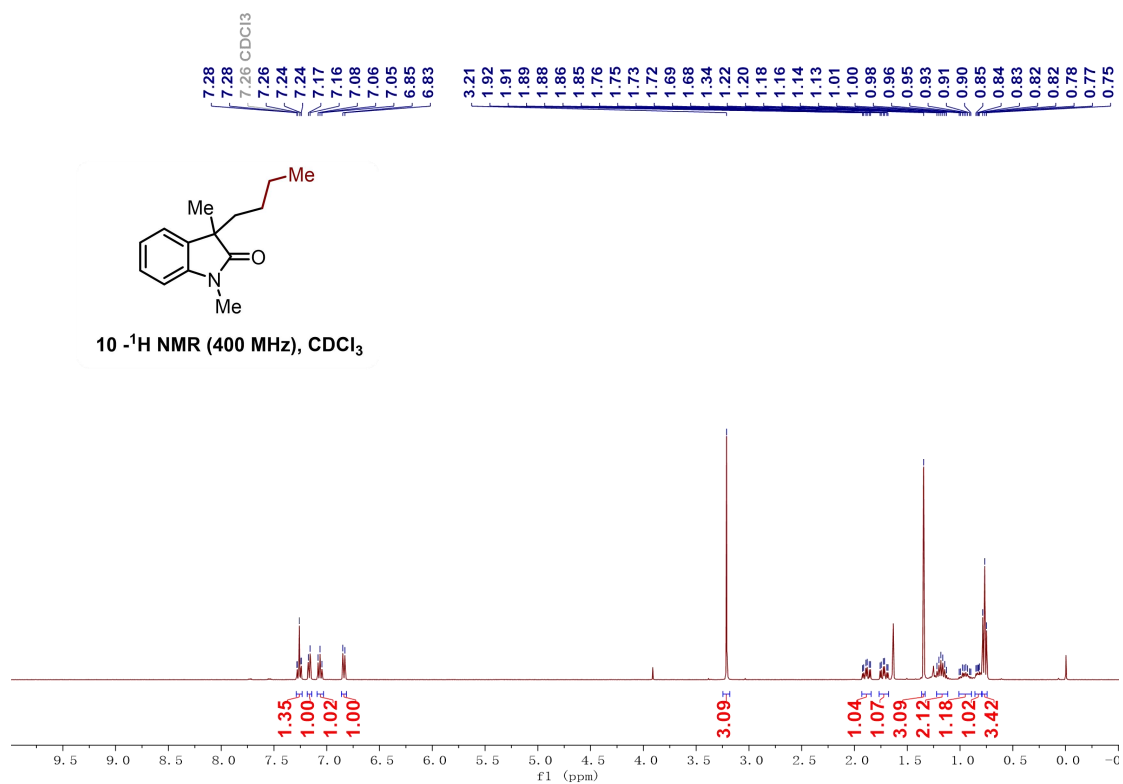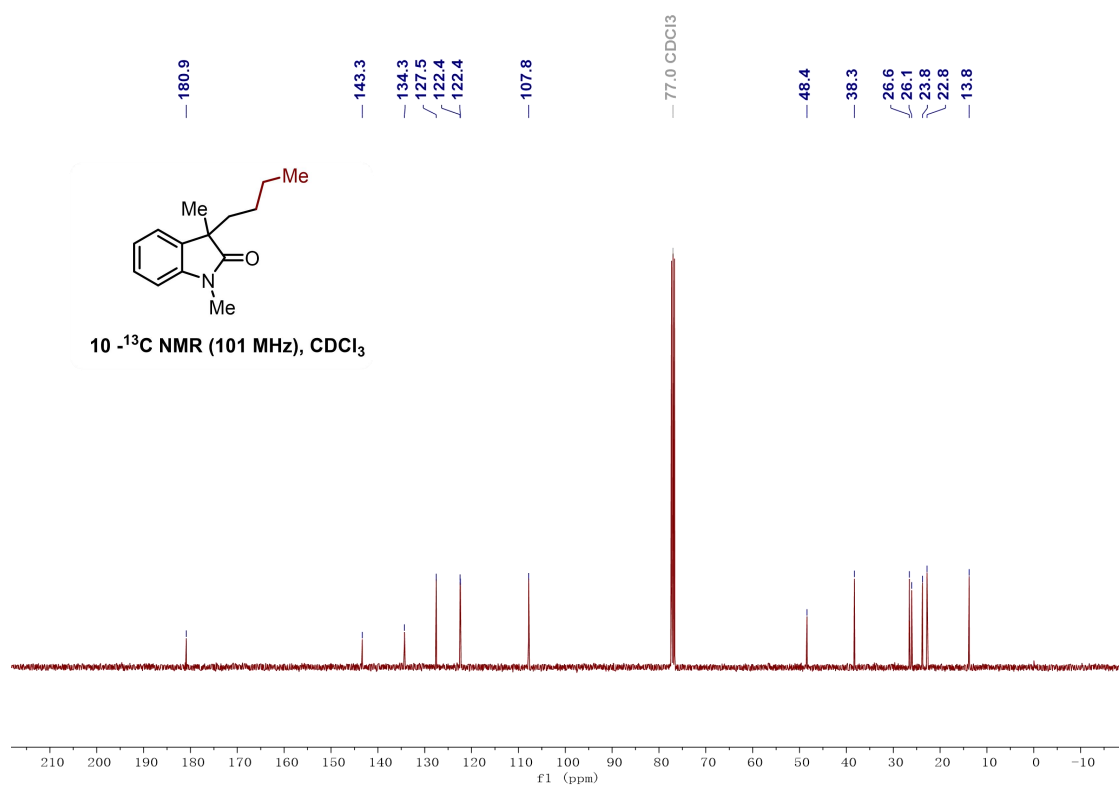



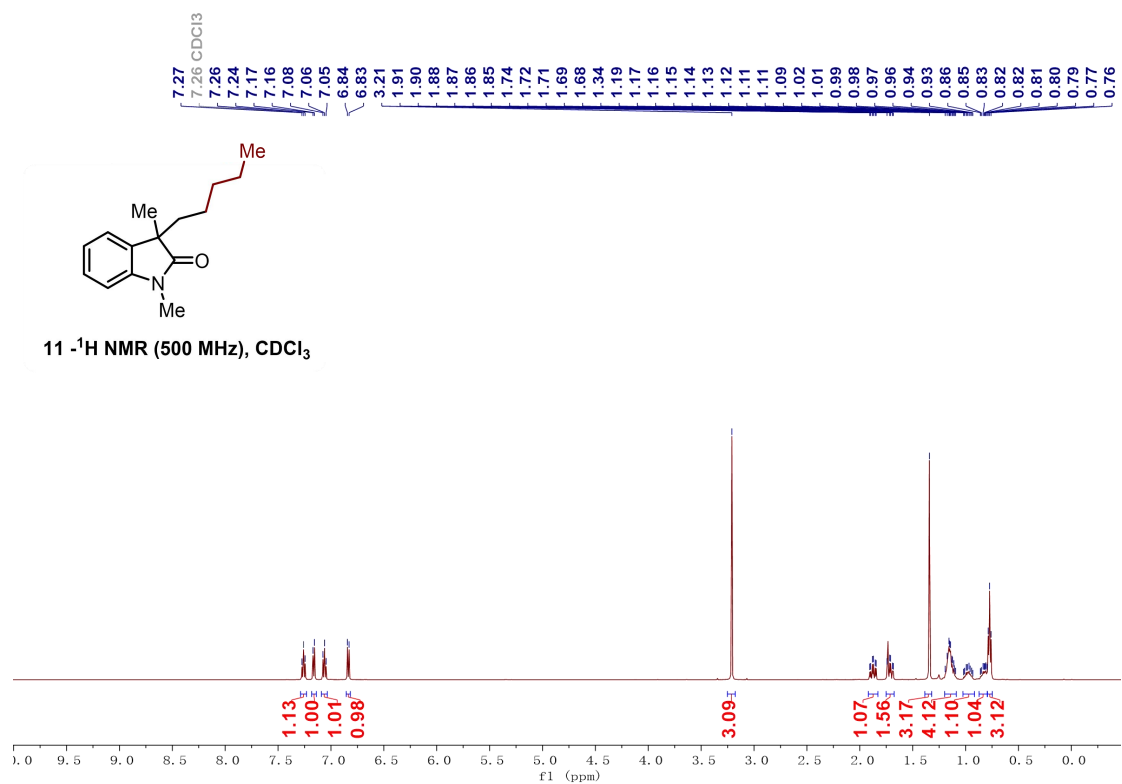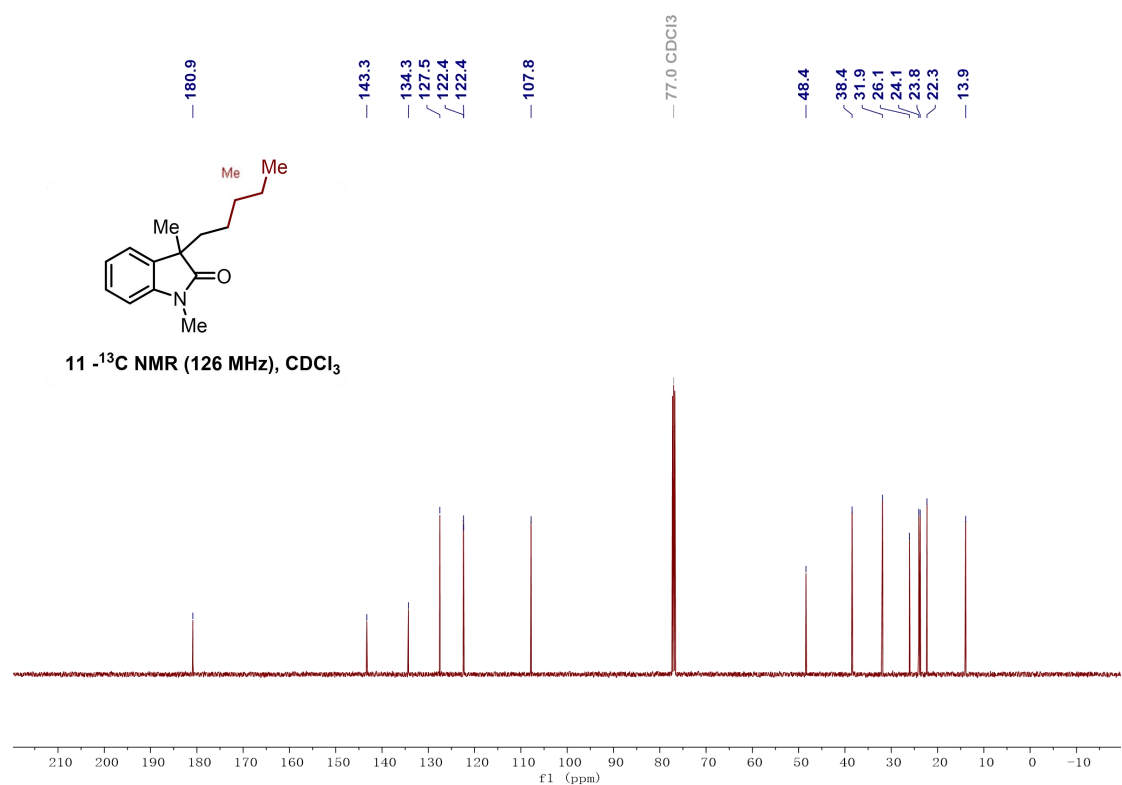

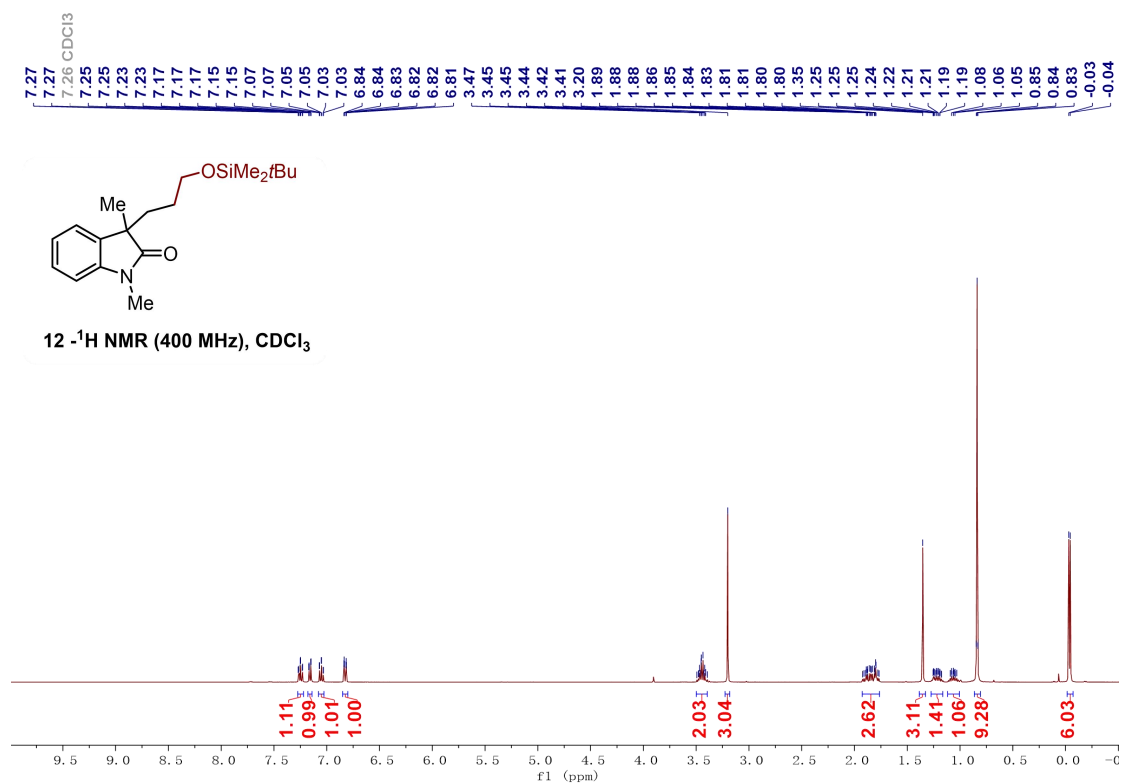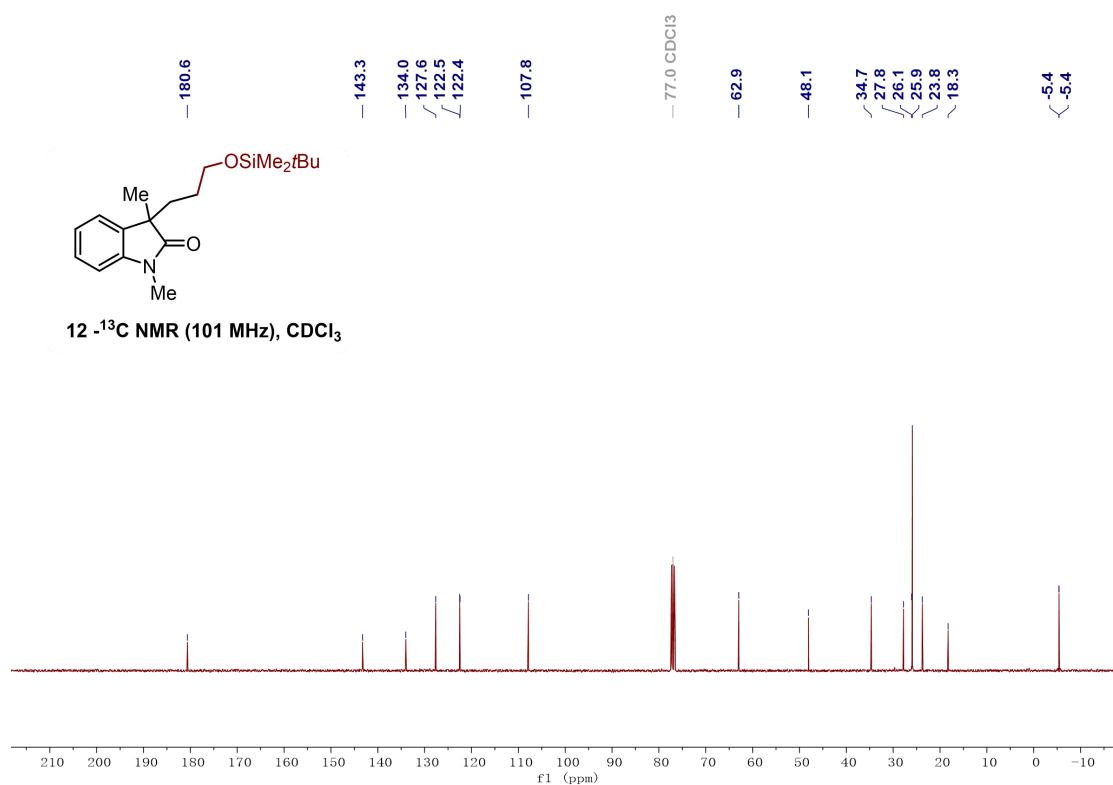

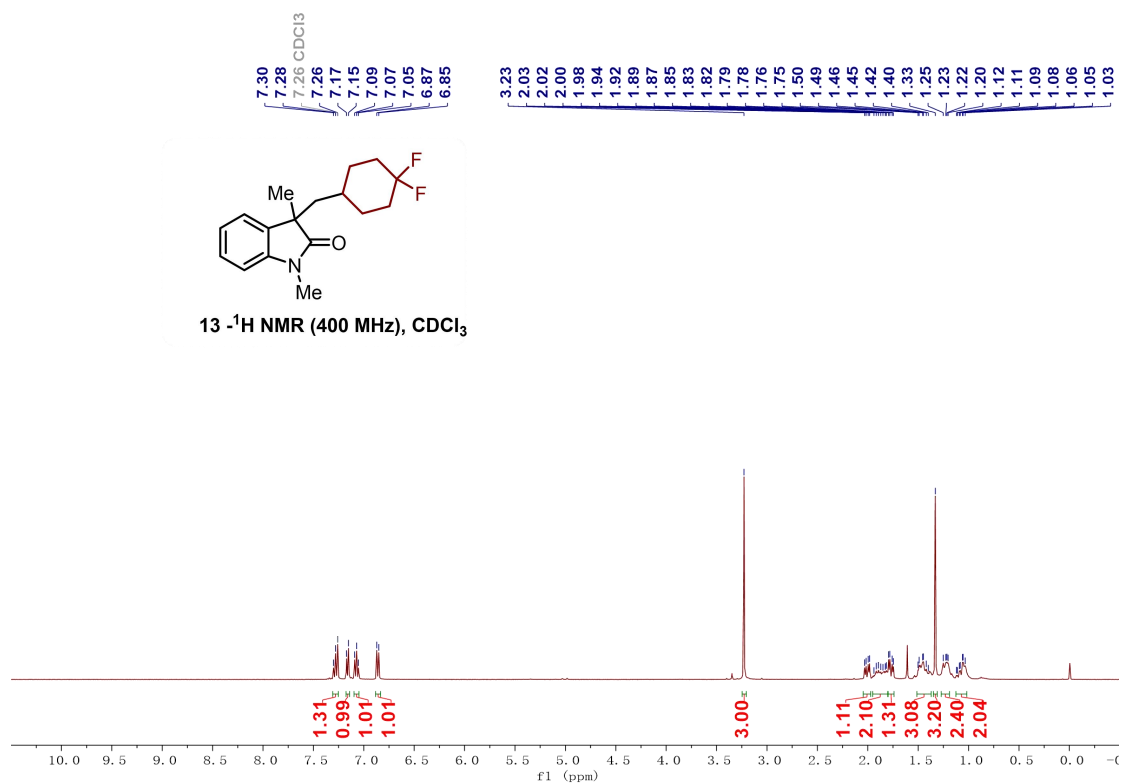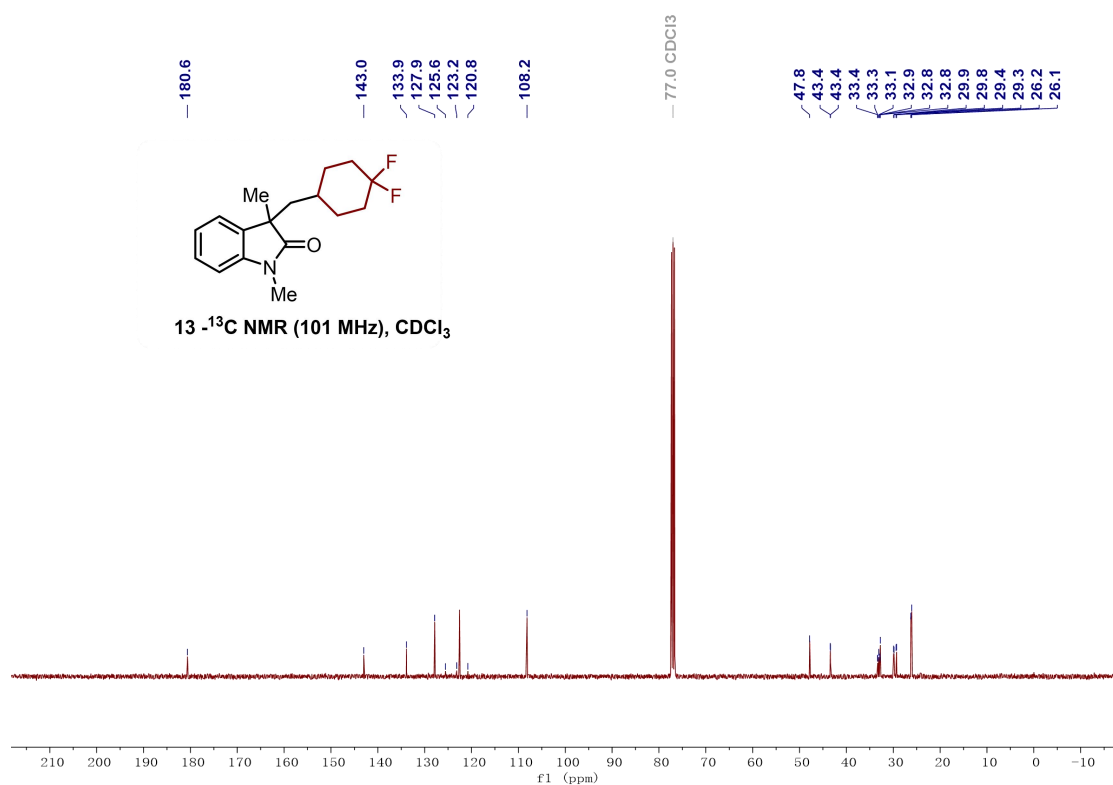

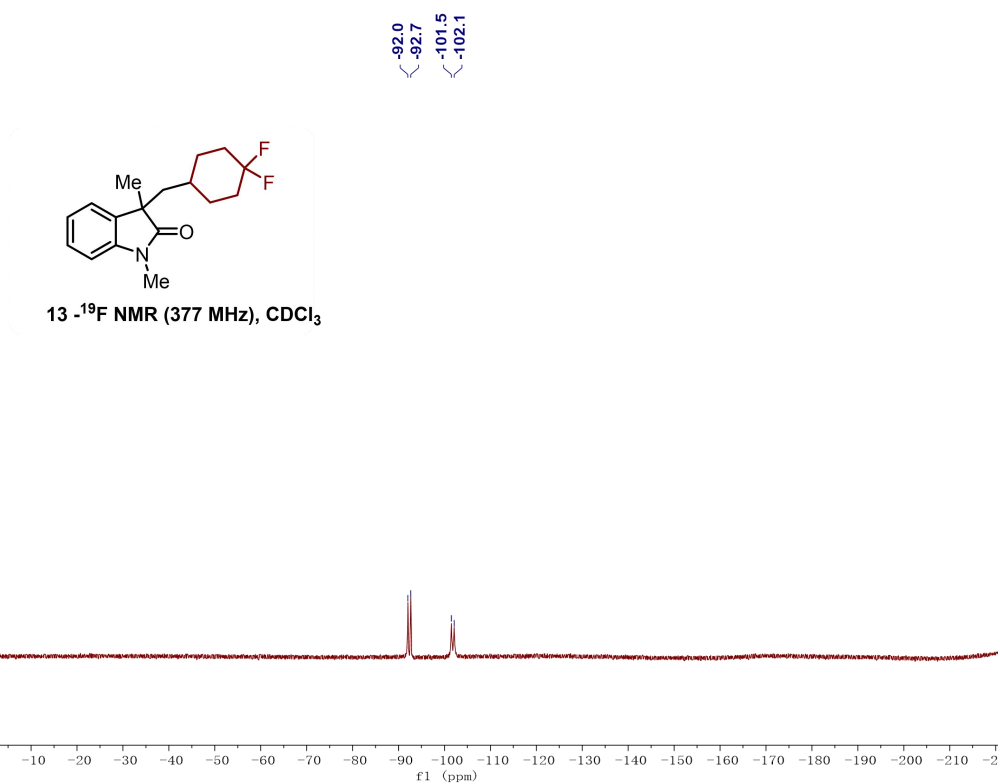

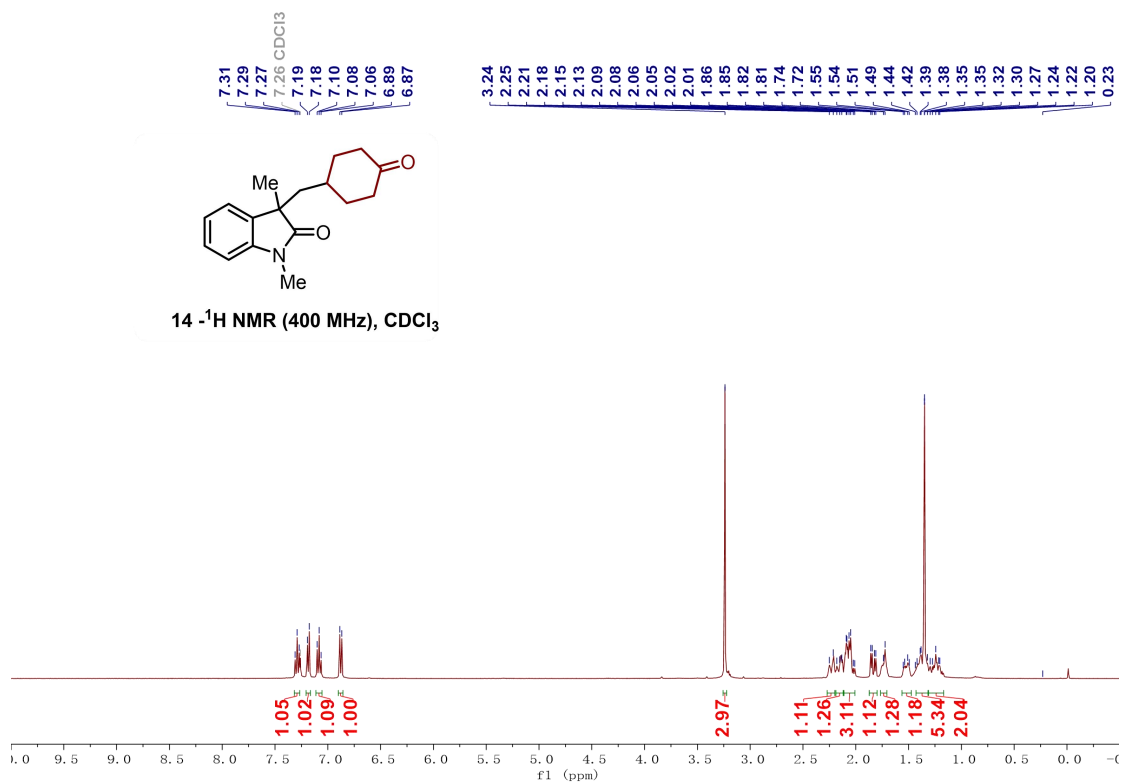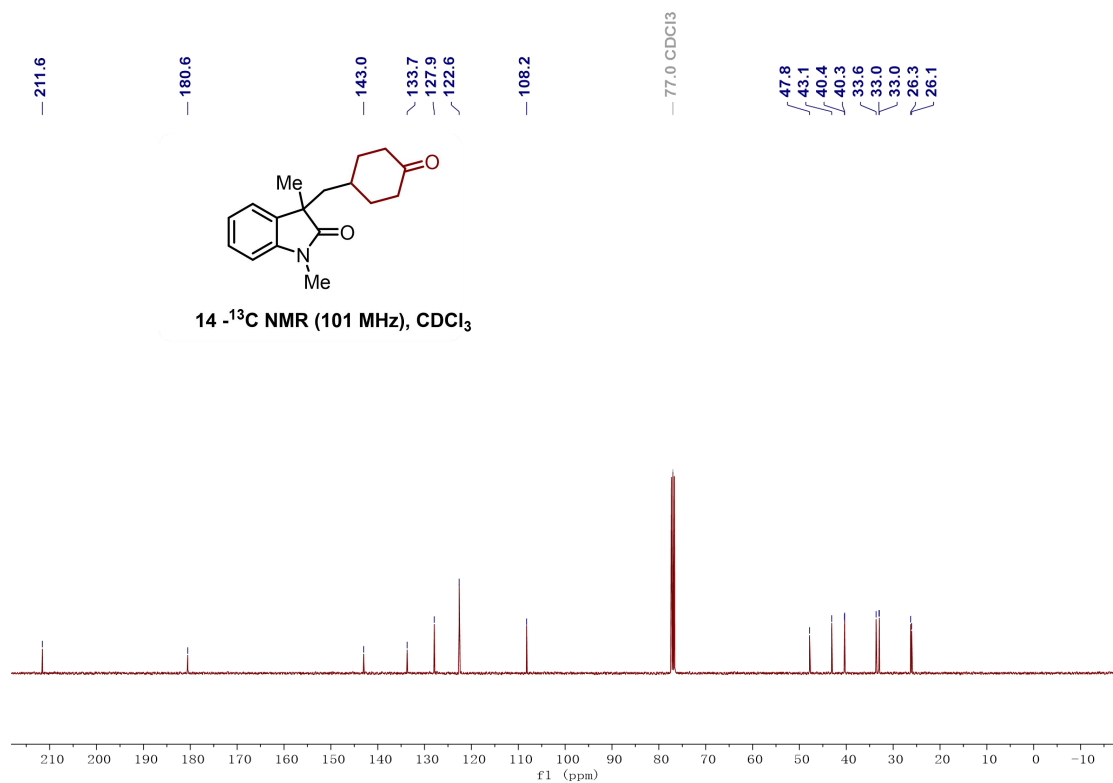

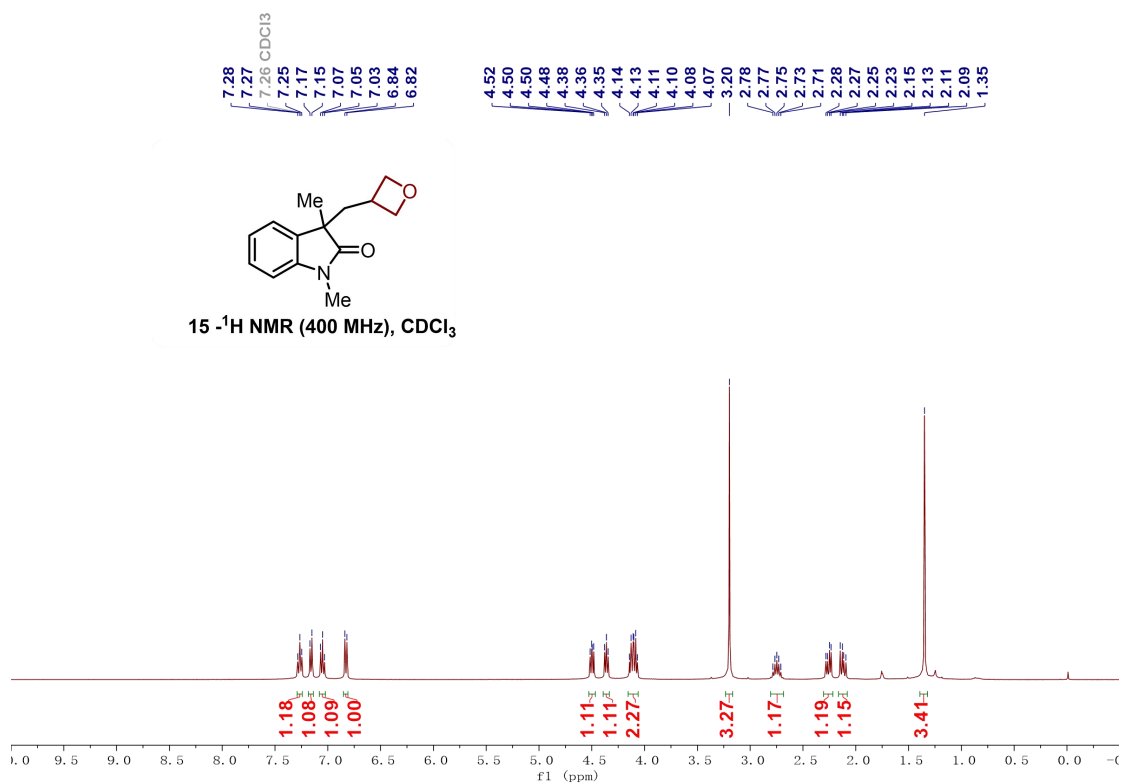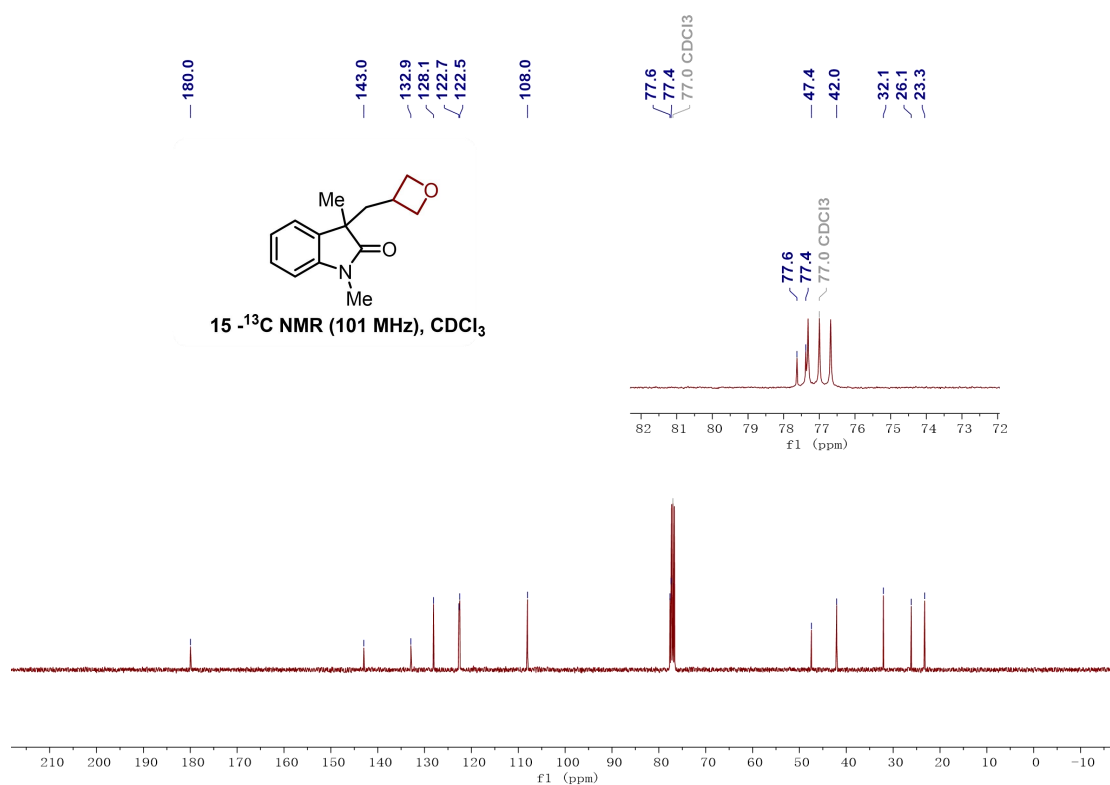

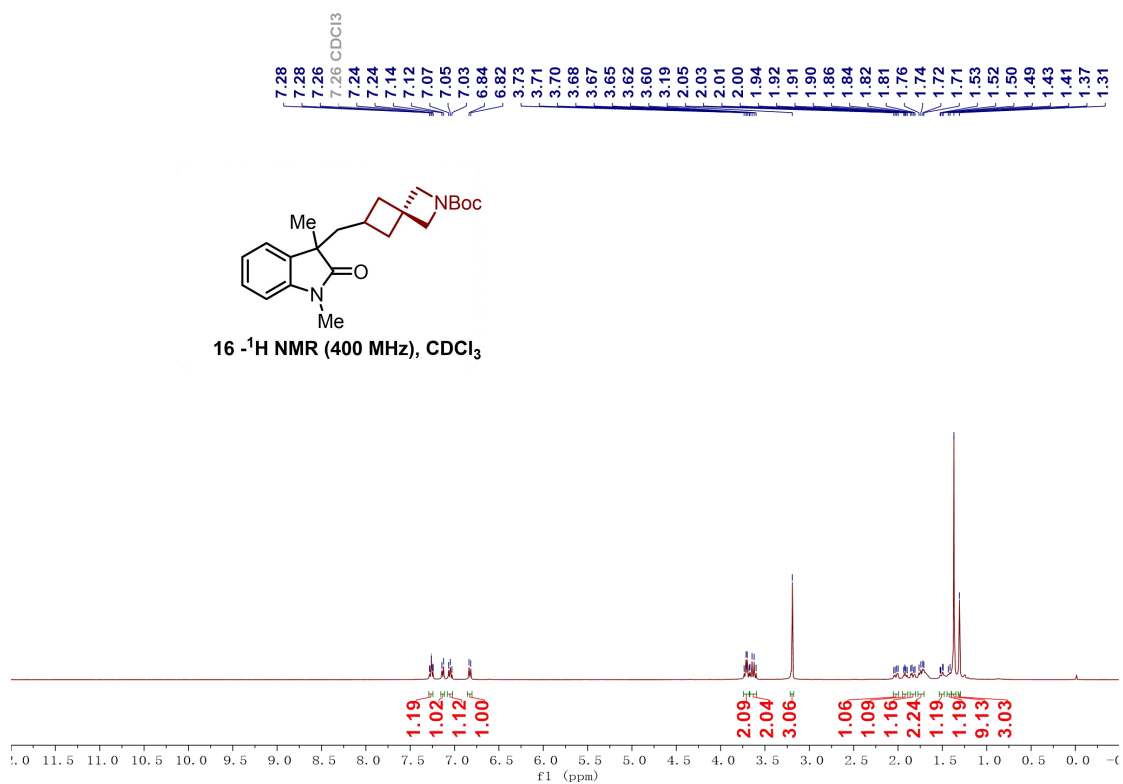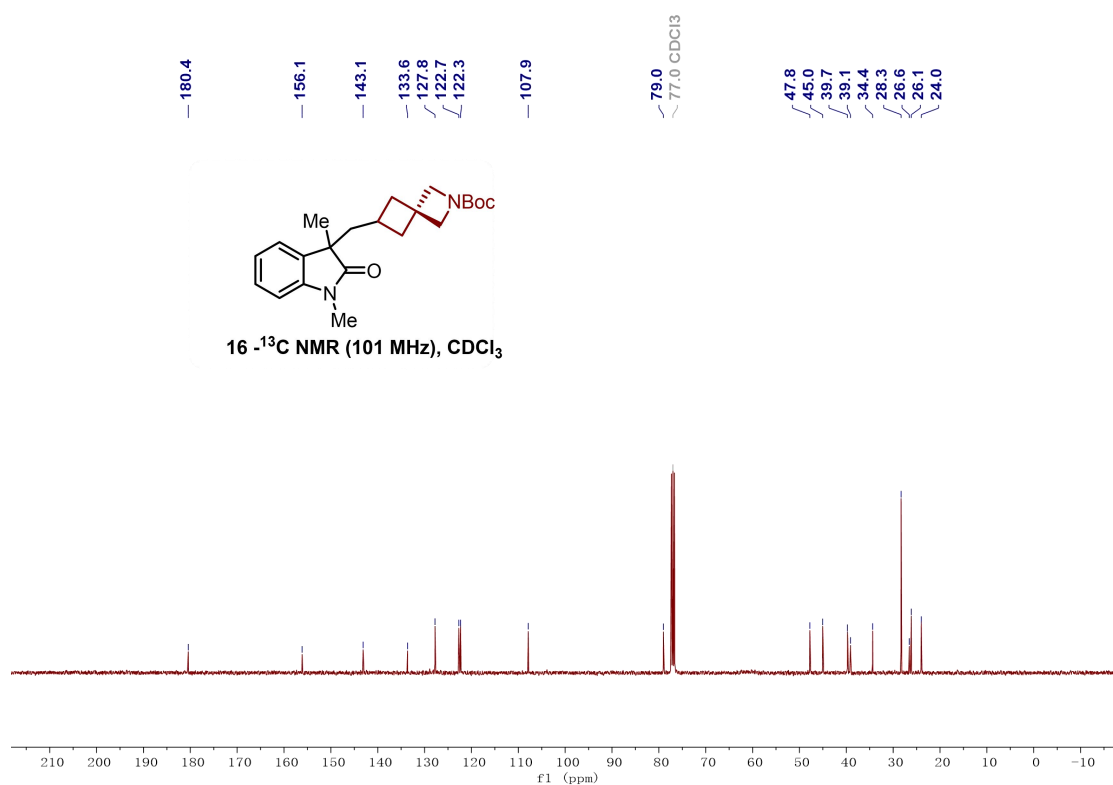

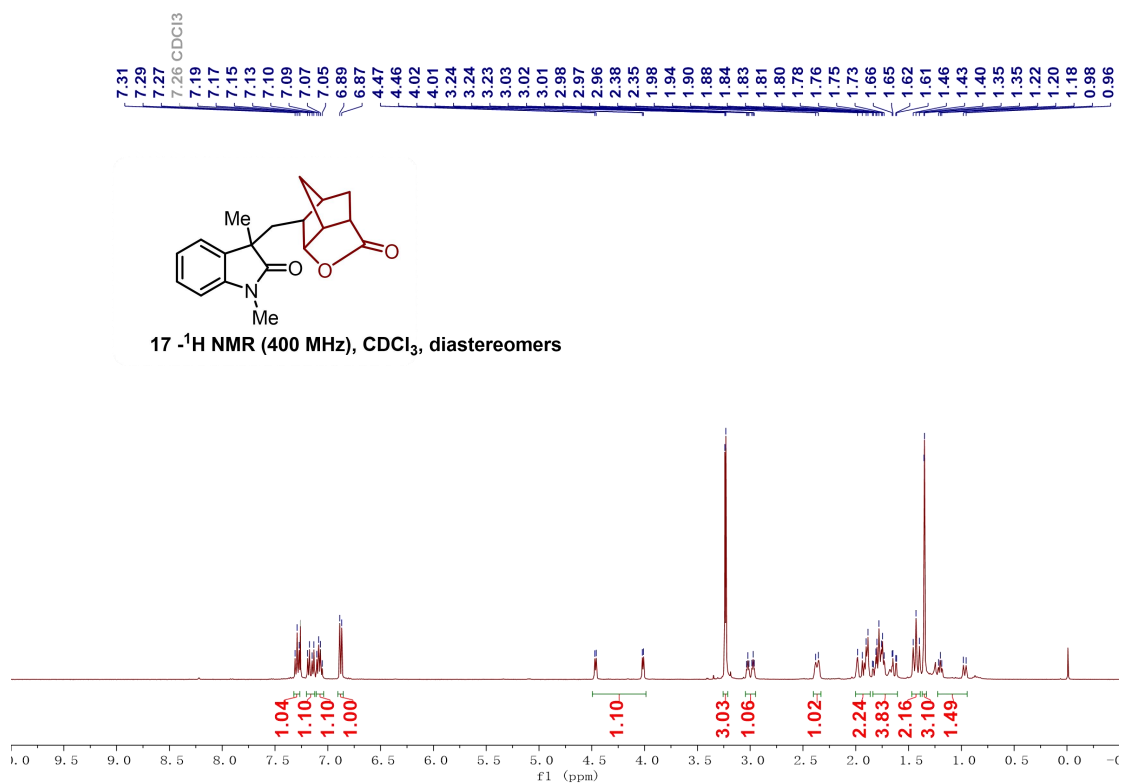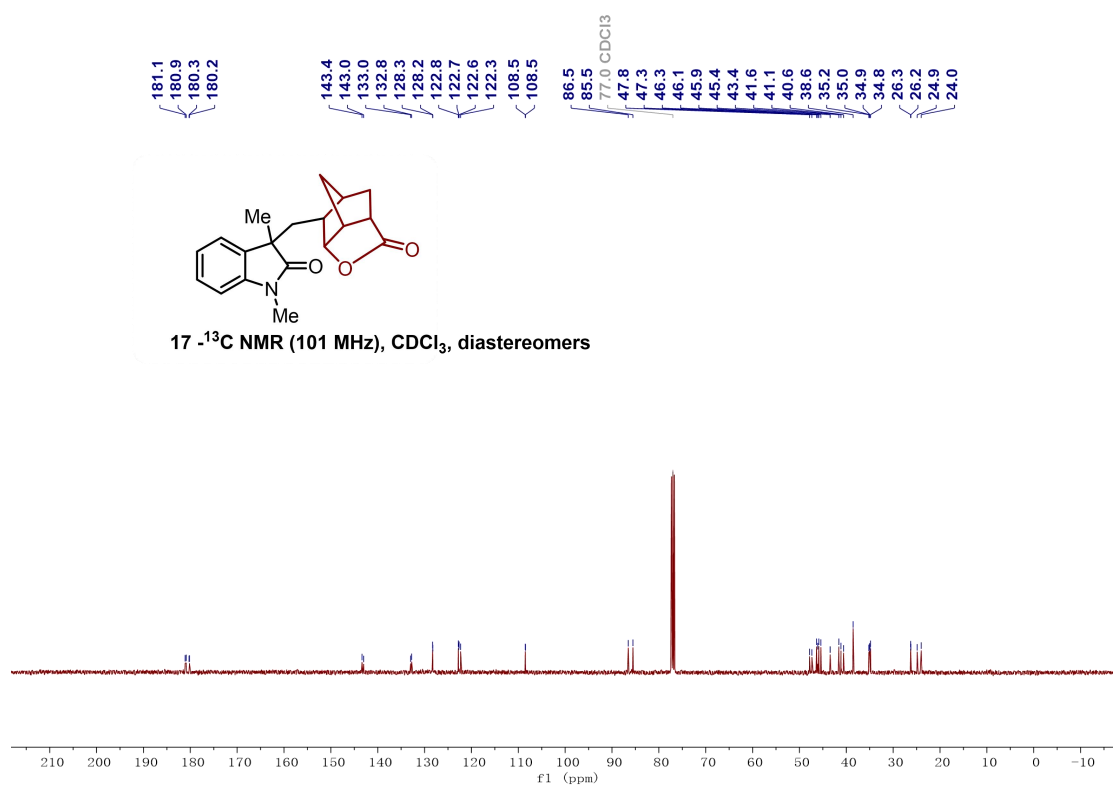



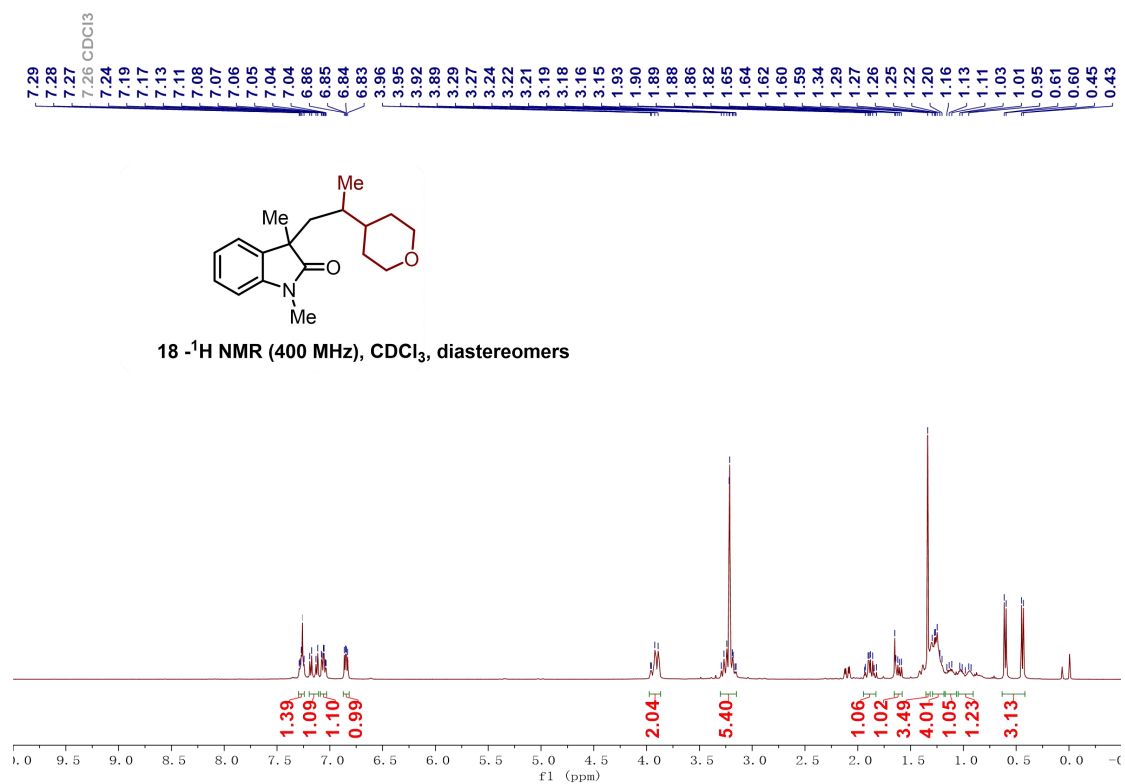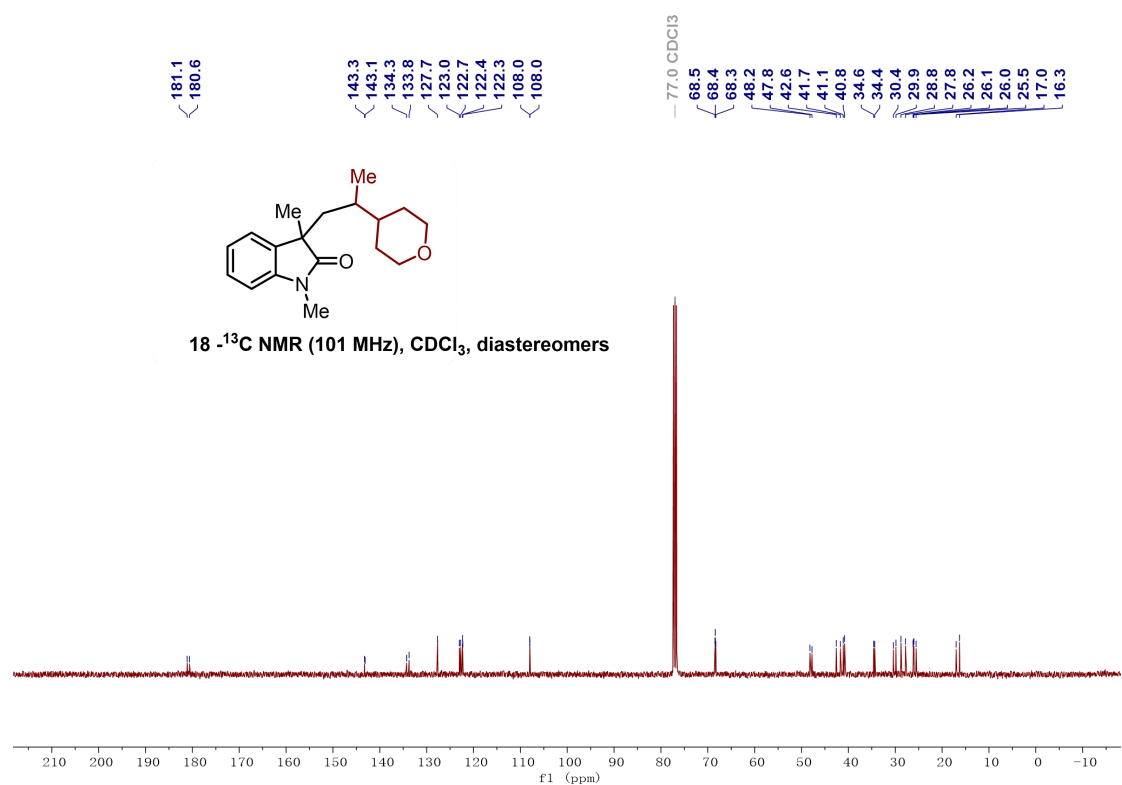

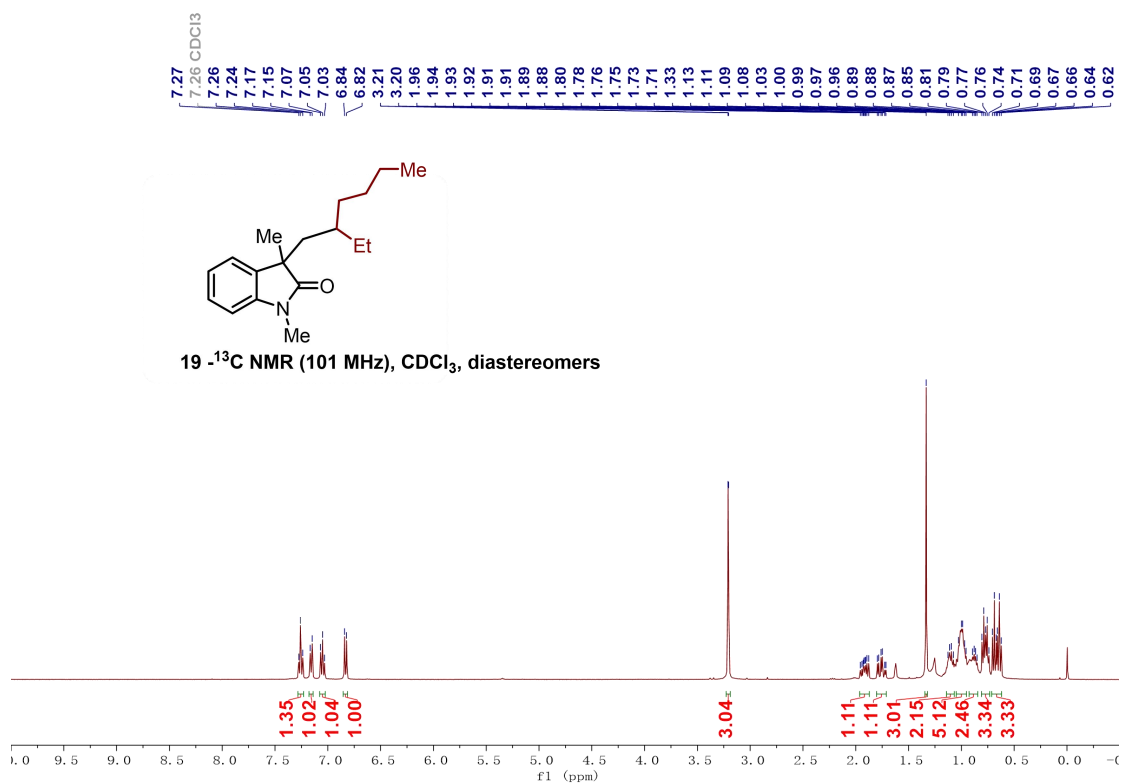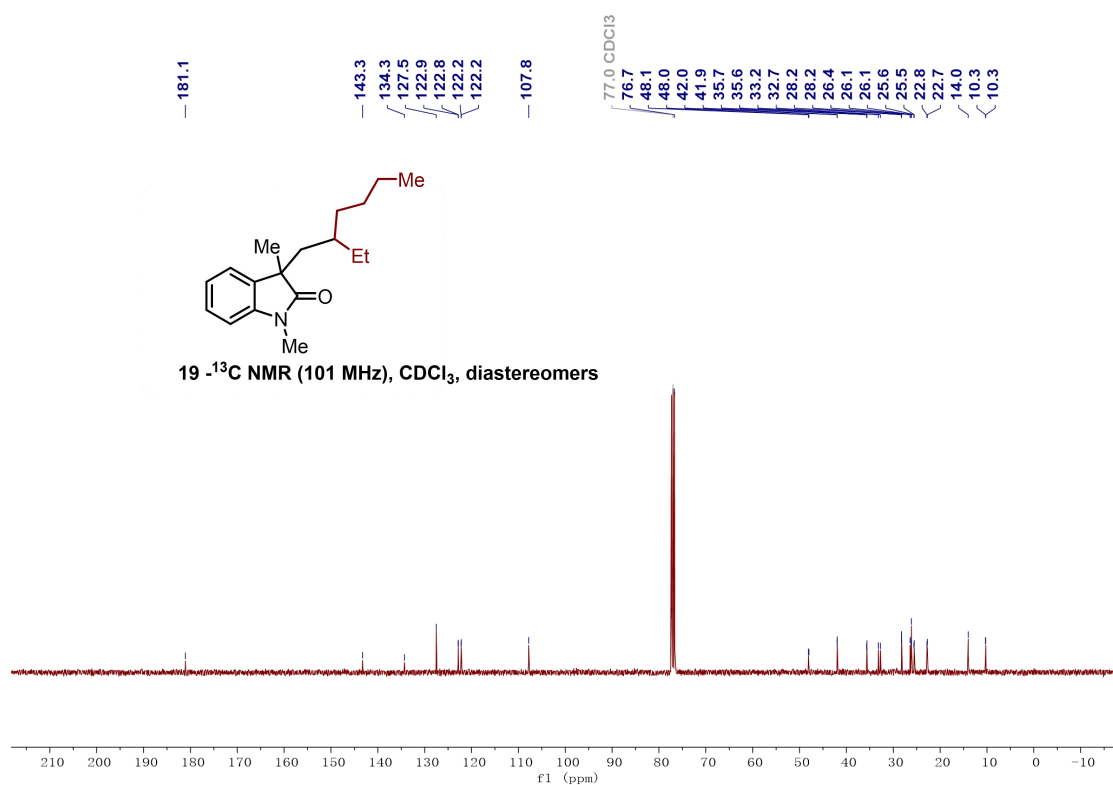

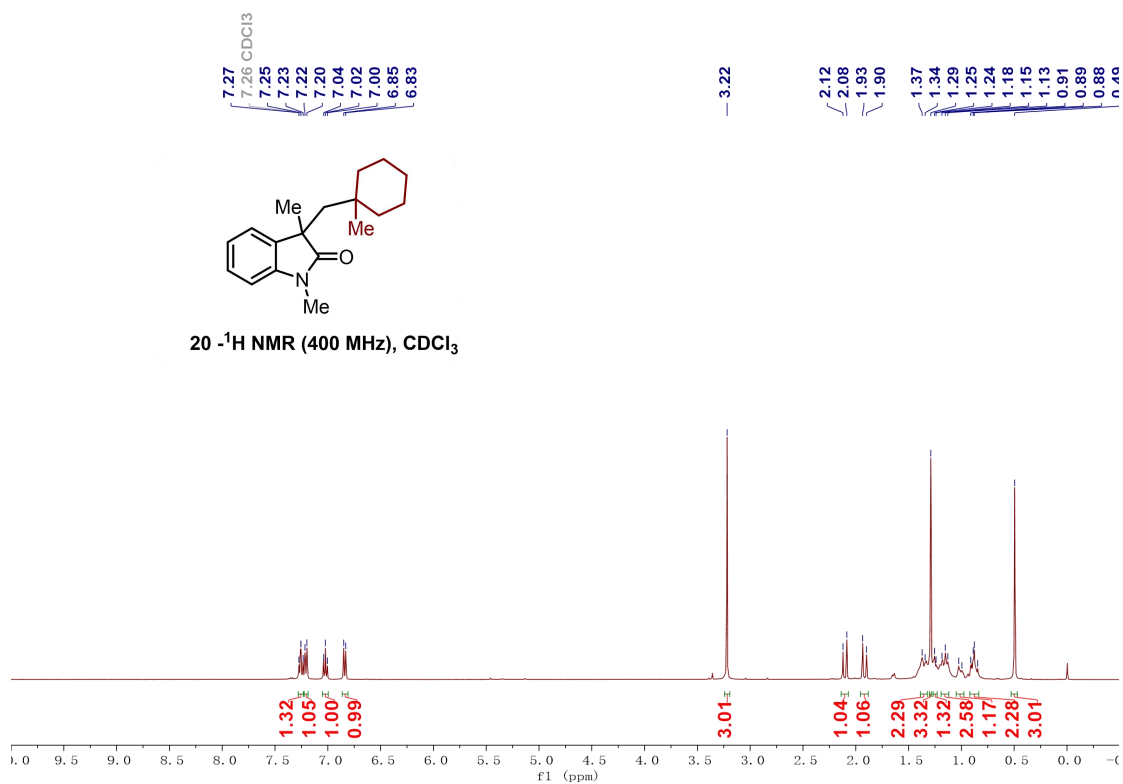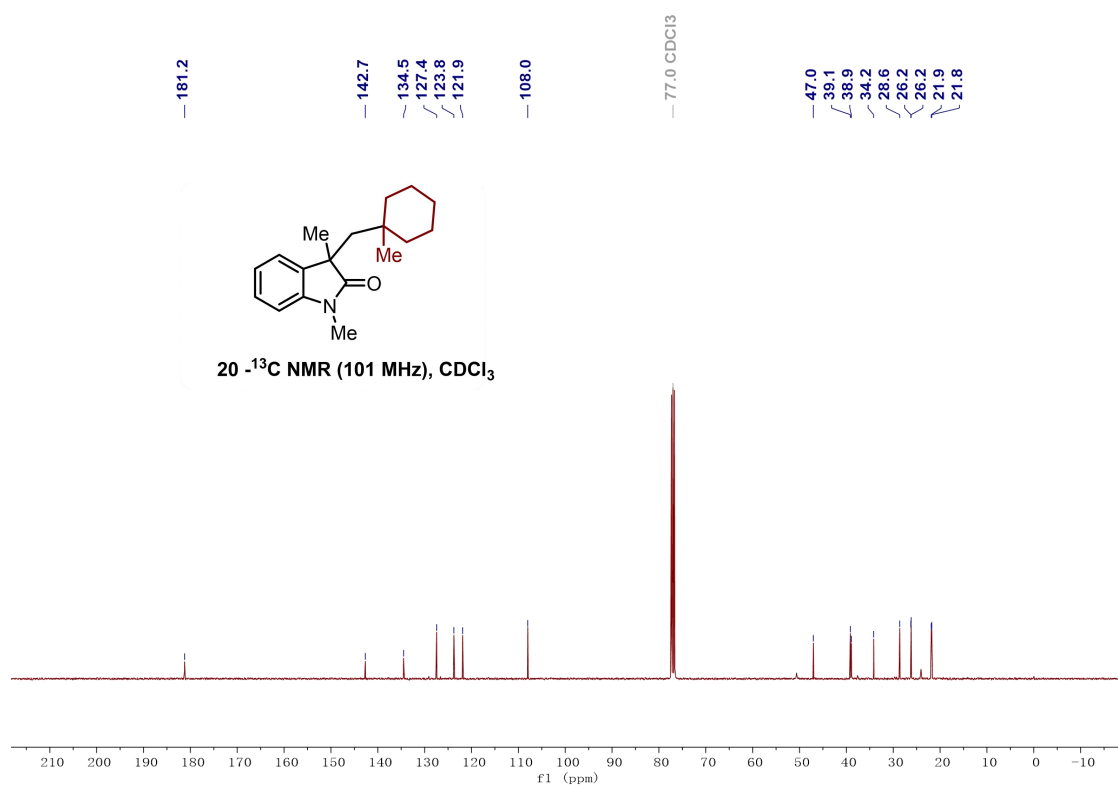

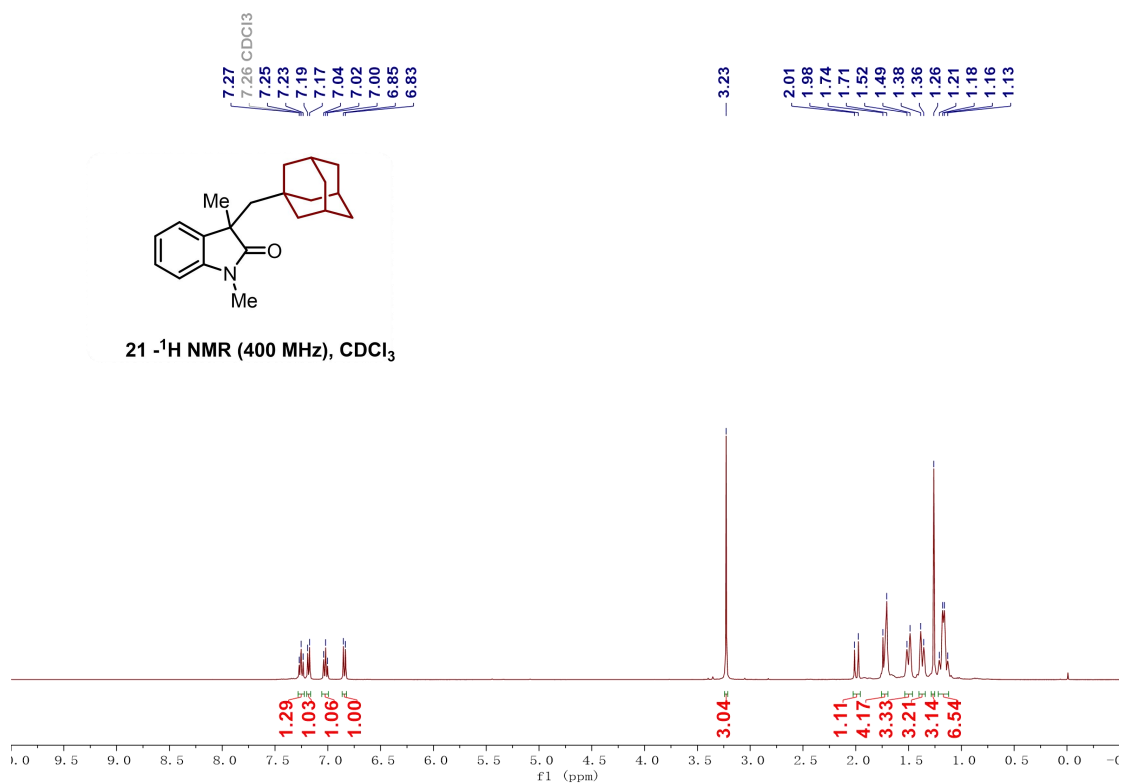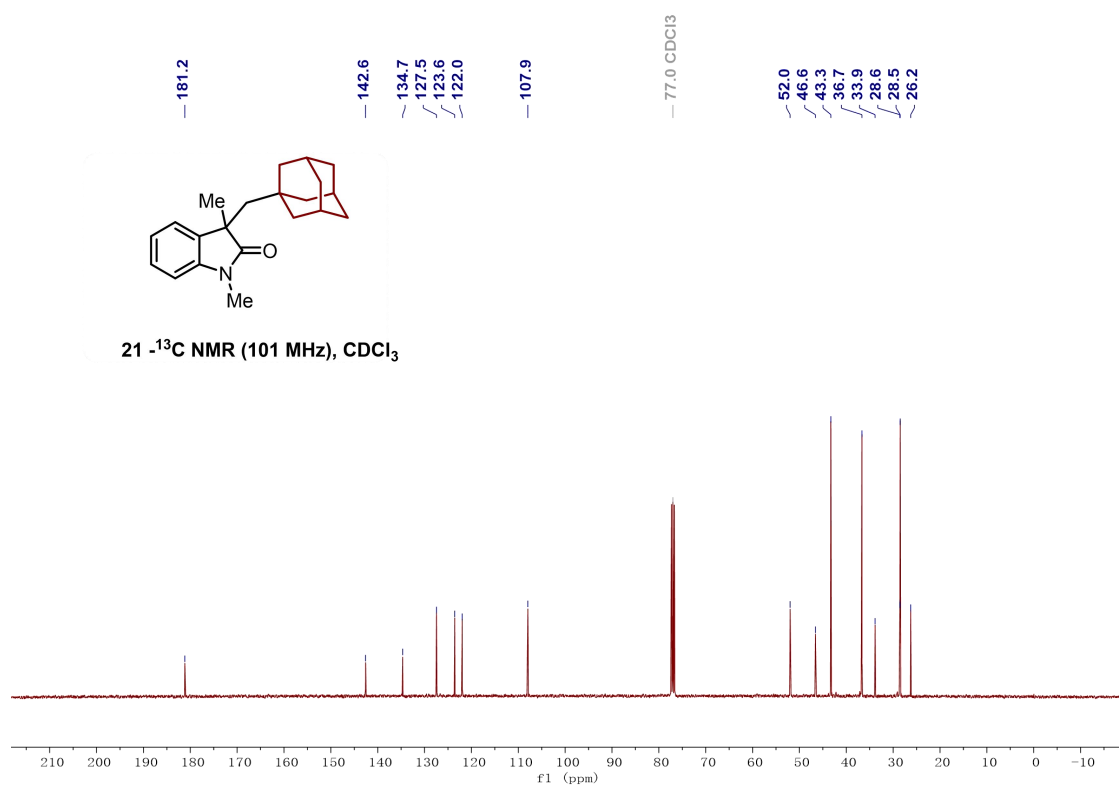

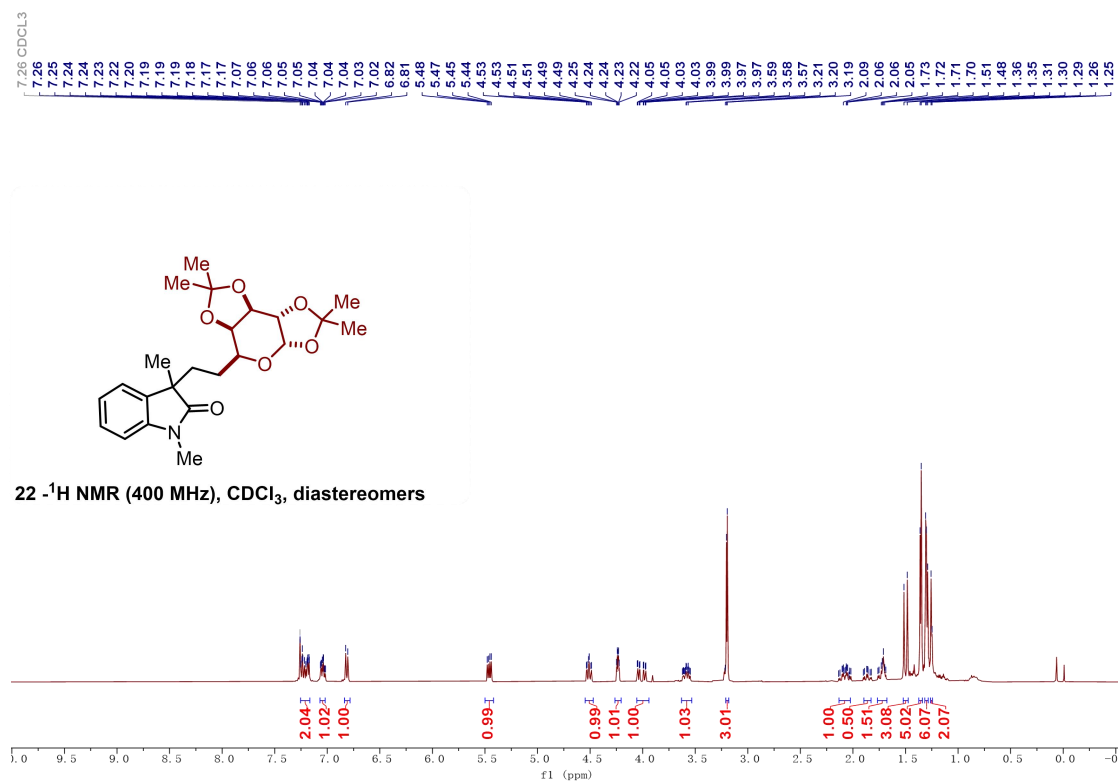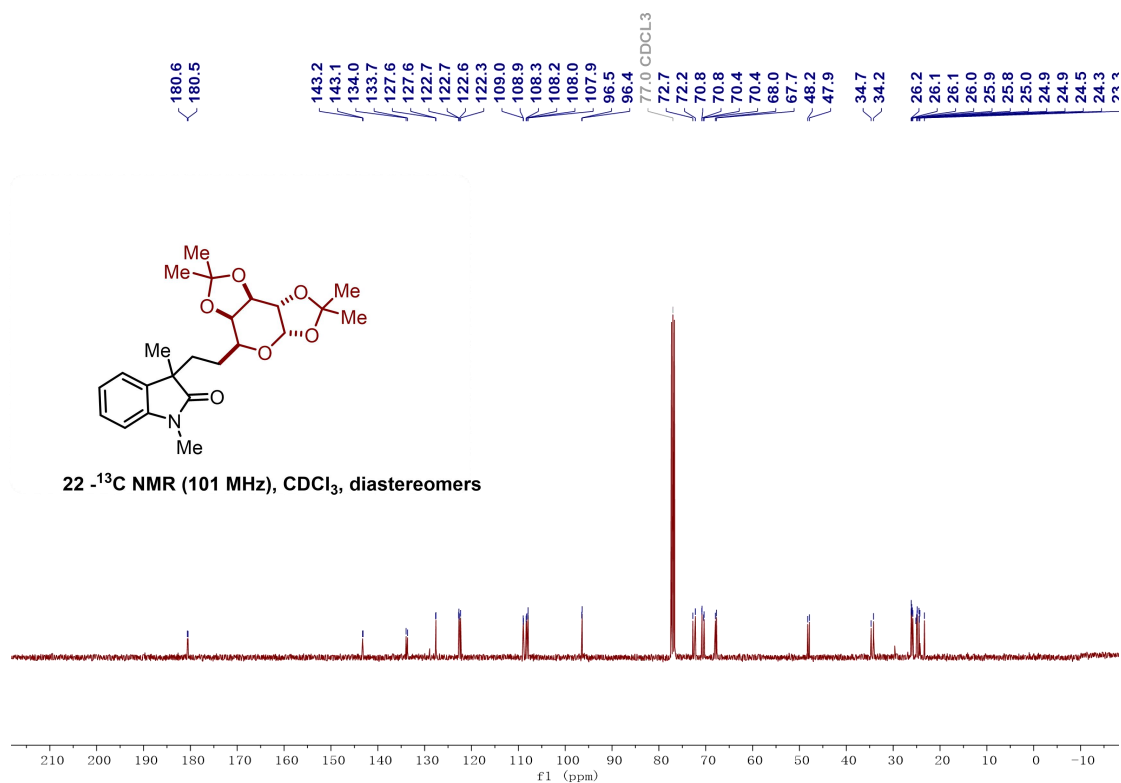

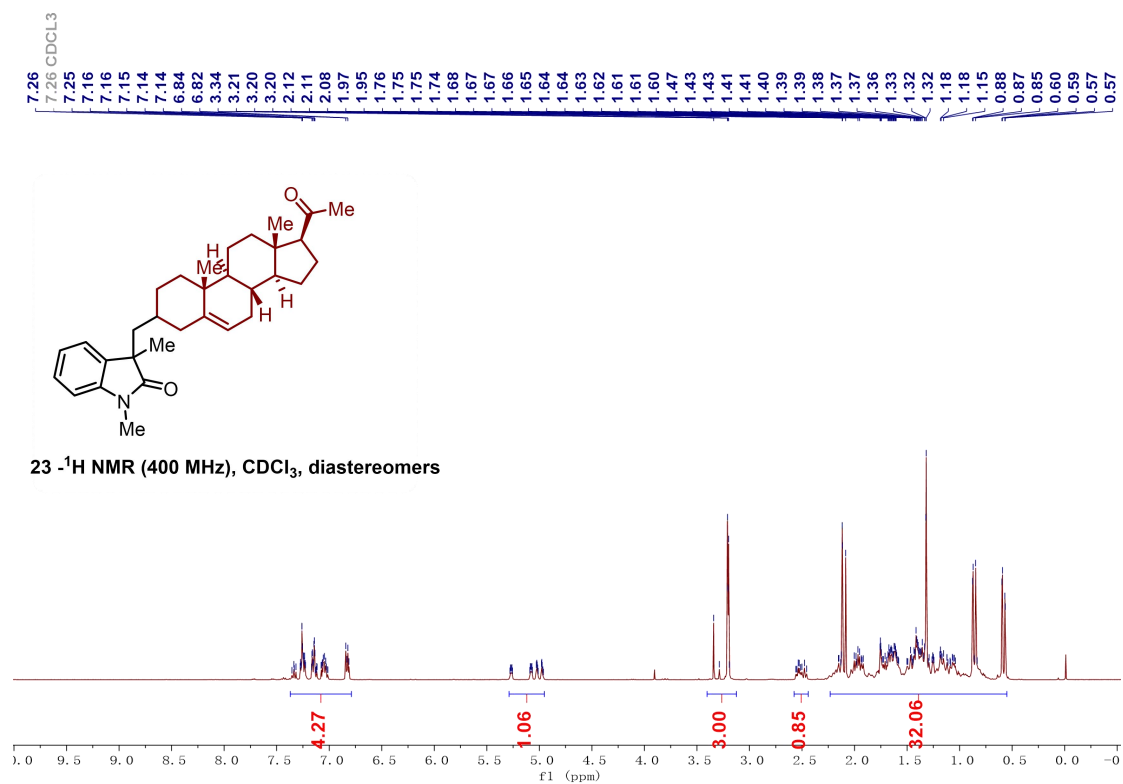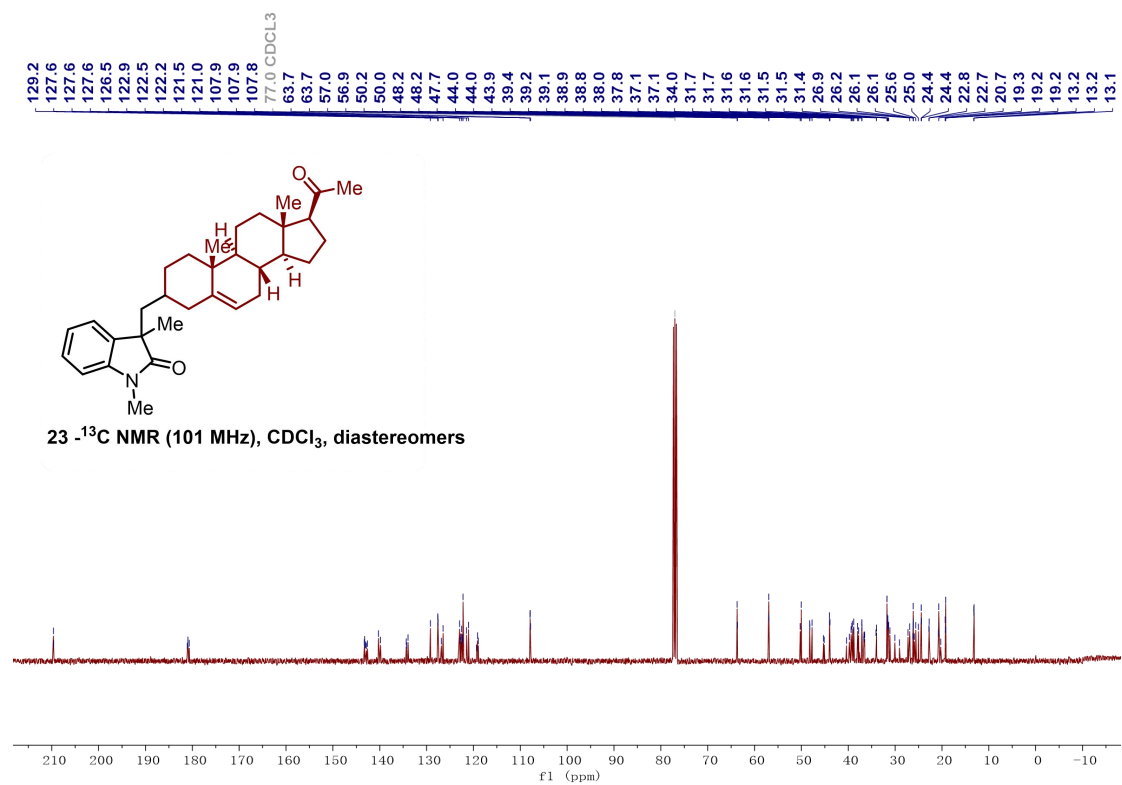

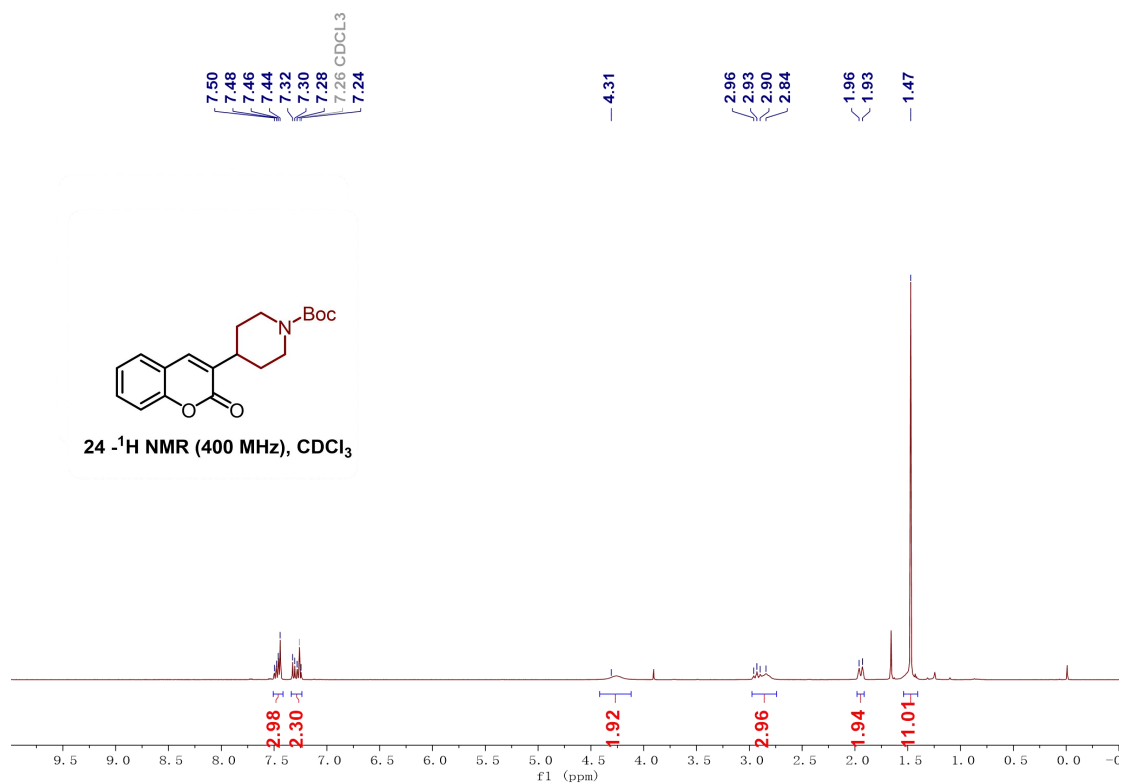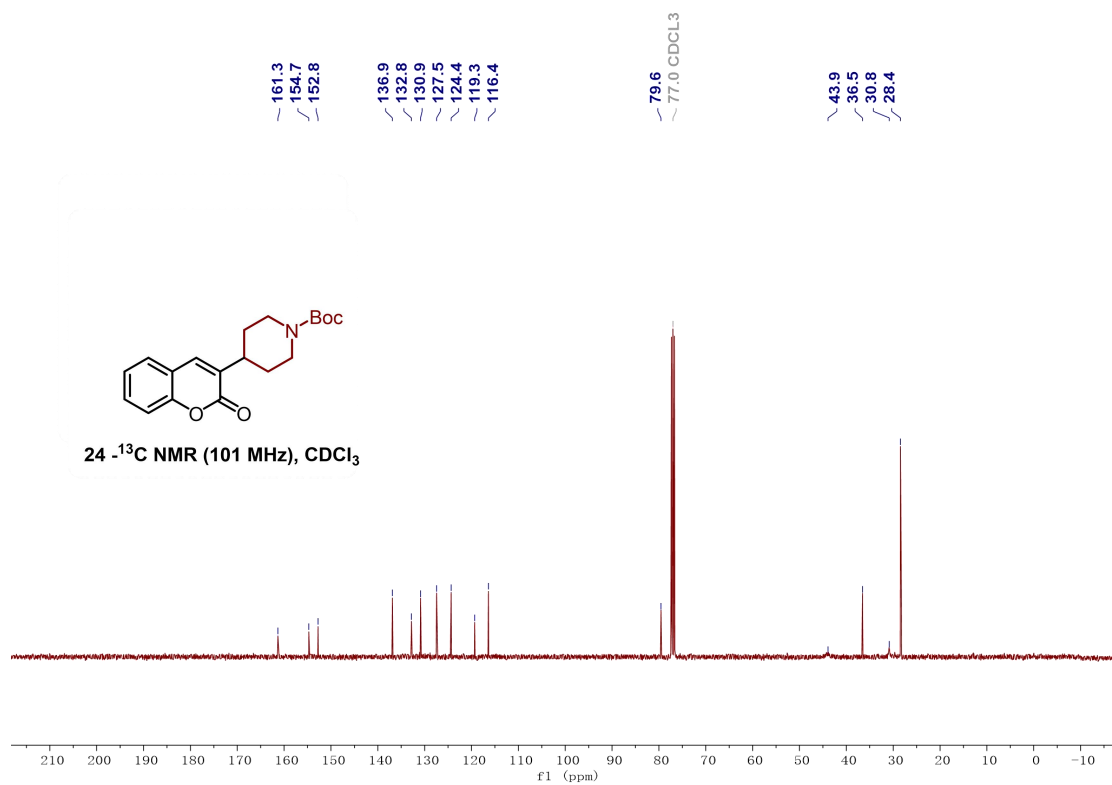

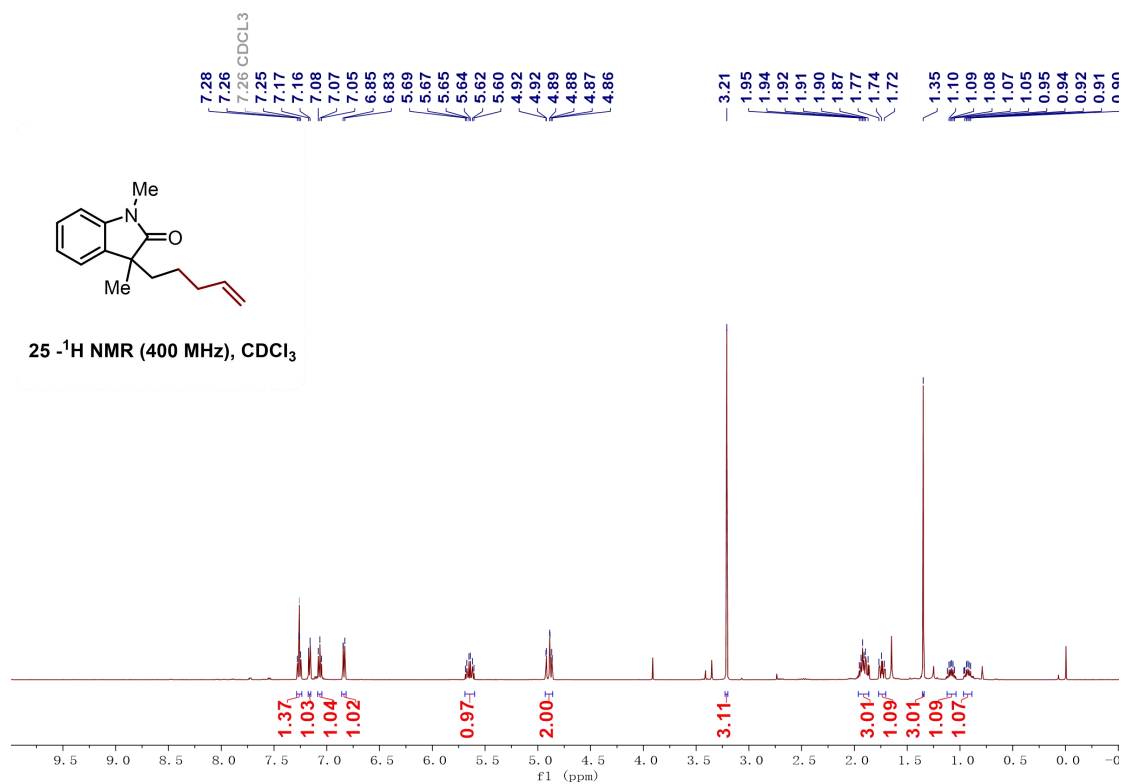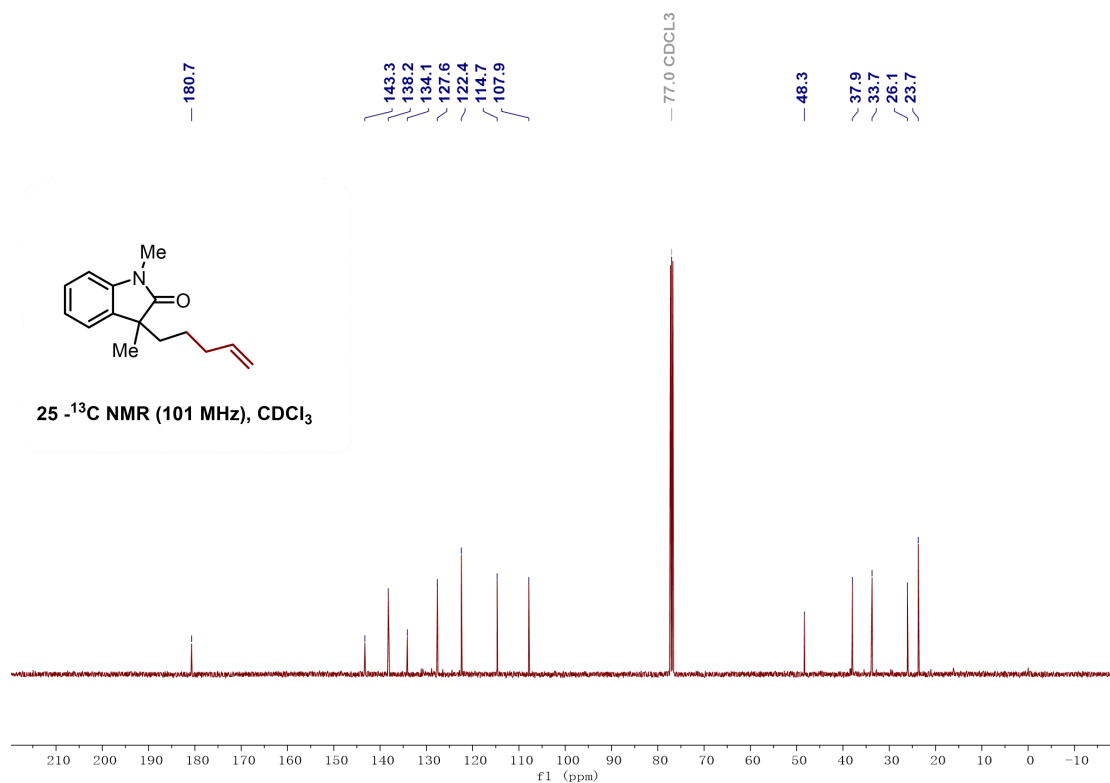



## 5. Reference

1. Muralirajan, K.; Kancherla, R.; Gimnkhana, A.; Rueping, M., *Org. Lett.* **2021**, *23*, 6905-6910.
2. Chen, H.; Sun, Z.; Yang, H.; Mao, F.; Yan, X.; Li, X.; Xu, X., *Synlett* **2022**, *34*, 63-66.
3. Yu, W.-Q.; Fan, J.-H.; Chen, P.; Xiong, B.-Q.; Xie, J.; Tang, K.-W.; Liu, Y., *Org. Biomol. Chem.* **2022**, *20*, 1958-1968.
4. Jin, C.; Yan, Z.; Sun, B.; Yang, J., *Org. Lett.* **2019**, *21*, 2064-2068.
